# 1 Foundation Models for Quantitative Biomarker Discovery in Cancer 2 Imaging

3  
4 **Authors** | Suraj Pai<sup>1,2,3</sup>, Dennis Bontempi<sup>1,2,3</sup>, Vasco Prudente<sup>1,2,3</sup>, Ibrahim Hadzic<sup>1,2,3</sup>, Mateo Sokač<sup>4,5</sup>, Tafadzwa  
5 L. Chaunzwa<sup>1,3</sup>, Simon Bernatz<sup>1,3</sup>, Ahmed Hosny<sup>1,3</sup>, Raymond H Mak<sup>1,2</sup>, Nicolai J Birkbak<sup>4,5</sup>, Hugo JWL Aerts<sup>1,2,3,6</sup>  
6

7 **Affiliations** | <sup>1</sup> Artificial Intelligence in Medicine (AIM) Program, Mass General Brigham, Harvard Medical  
8 School, Harvard Institutes of Medicine, 77 Avenue Louis Pasteur, Boston, MA 02115, United States of America;  
9 <sup>2</sup>Radiology and Nuclear Medicine, CARIM & GROW, Maastricht University, Universiteitssingel 40, 6229 ER  
10 Maastricht, The Netherlands; <sup>3</sup>Department of Radiation Oncology, Brigham and Women's Hospital, Dana-  
11 Farber Cancer Institute, Harvard Medical School, 75 Francis Street and 450 Brookline Avenue, Boston, MA  
12 02115, USA; <sup>4</sup>Department of Molecular Medicine, Aarhus University Hospital, 8200 Aarhus, Denmark;  
13 <sup>5</sup>Department of Clinical Medicine, Aarhus University, 8200 Aarhus, Denmark; <sup>6</sup>Department of Radiology,  
14 Brigham and Women's Hospital, Dana-Farber Cancer Institute, Harvard Medical School, 75 Francis Street and  
15 450 Brookline Avenue, Boston, MA 02115, USA;  
16

17 **Running title** | Foundation Model for Cancer Imaging Biomarkers  
18

19 **Corresponding author** | Hugo JWL Aerts, Ph.D., Artificial Intelligence in Medicine (AIM) Program, Mass  
20 General Brigham, Harvard Medical School, Harvard Institutes of Medicine – HIM 343, 77 Avenue Louis Pasteur,  
21 Boston, MA 02115, P - 617.525.7156, F - 617.582.6037, Email: [Hugo\\_Aerts@DFCI.harvard.edu](mailto:Hugo_Aerts@DFCI.harvard.edu)  
22  
23

24 **Abstract | Foundation models represent a recent paradigm shift in deep learning, where a single large-scale**  
25 **model trained on vast amounts of data can serve as the foundation for various downstream tasks.**  
26 **Foundation models are generally trained using self-supervised learning and excel in reducing the demand**  
27 **for training samples in downstream applications. This is especially important in medicine, where large**  
28 **labeled datasets are often scarce. Here, we developed a foundation model for imaging biomarker discovery**  
29 **by training a convolutional encoder through self-supervised learning using a comprehensive dataset of**  
30 **11,467 radiographic lesions. The foundation model was evaluated in distinct and clinically relevant**  
31 **applications of imaging-based biomarkers. We found that they facilitated better and more efficient learning**  
32 **of imaging biomarkers and yielded task-specific models that significantly outperformed their conventional**  
33 **supervised counterparts on downstream tasks. The performance gain was most prominent when training**  
34 **dataset sizes were very limited. Furthermore, foundation models were more stable to input and inter-reader**  
35 **variations and showed stronger associations with underlying biology. Our results demonstrate the**  
36 **tremendous potential of foundation models in discovering novel imaging biomarkers that may extend to**  
37 **other clinical use cases and can accelerate the widespread translation of imaging biomarkers into clinical**  
38 **settings.**

## 41 INTRODUCTION

42 Foundation models present a paradigm shift in deep learning wherein a model trained on vast amounts of  
43 unannotated data can serve as the foundation of a wide range of downstream tasks. Recently foundation  
44 models have provided unprecedented performance gains in language, vision, and several other domains<sup>1</sup>. In  
45 the field of natural language processing (NLP), for example, foundation models drive the successes of  
46 applications such as ChatGPT<sup>2</sup>, BERT<sup>3</sup>, and CLIP<sup>4</sup>. Similarly, foundation models, such as SimCLR<sup>5</sup> and DINO<sup>6</sup>,  
47 have reported considerable success in computer vision applications.

48 Medicine represents a vast potential for foundation models as labeled data are scarce, while  
49 multimodal data, such as medical images, biologic, and clinical notes, are frequently collected in routine  
50 clinical care<sup>7</sup>. Indeed, different applications of foundation models, such as augmented surgical procedures,  
51 bedside decision support, interactive radiology reports, and note-taking, have been reported<sup>8</sup>.

52 While many studies investigating imaging-based biomarkers incorporate supervised deep learning  
53 algorithms into their models<sup>9-11</sup>, they are typically applied in scenarios where large datasets are available for  
54 training and testing. The quantity and quality of annotated data are strongly linked to the robustness of deep  
55 learning models. Access to large amounts of annotated data for specialized applications is often challenging  
56 and demands expertise, time, and labor. In such scenarios, many investigators fall back on traditional  
57 handcrafted or engineered approaches based on defined mathematical and statistical algorithms that analyze  
58 attributes like the shape and texture of objects in images, which limit the scope of discovery. This caveat is

59 commonplace in many scenarios where insights from imaging-based biomarkers have great potential in  
60 informing clinical care.

61 Foundation models are generally pre-trained using self-supervised learning (SSL), a set of methods  
62 that leverage innate information available within data by learning generalized, task-agnostic representations  
63 (features) from large amounts of unannotated samples. Existing literature<sup>12</sup> has suggested several strategies  
64 to pre-train networks to learn these representations. Approaches such as defining pre-text tasks that distort  
65 an image and attempt to reconstruct the original or contrastively learning similar representations for  
66 augmented views of the same image have primarily been investigated. Following pre-training, foundation  
67 models can be applied to task-specific problems, improving generalization, especially in tasks with small  
68 datasets. The expanding literature on SSL in medical imaging<sup>13</sup> focuses primarily on two-dimensional images  
69 (X-ray, whole slide images, dermatology images, fundus images, etc.) and diagnostic applications. There is still  
70 limited evidence investigating whether SSL can help train foundation models that learn general, robust, and  
71 transferrable representations that can act as imaging biomarkers, especially prognostic, for tasks of clinical  
72 relevance.

73 In this study, we investigated whether foundation models pre-trained using self-supervised learning  
74 can improve the development of deep learning-based imaging biomarkers. The foundation model was pre-  
75 trained on 11,467 diverse and annotated lesions identified on computed tomography (CT) imaging from 2,312  
76 unique patients<sup>14</sup>. The model was first technically validated on the classification of anatomical site lesions (use-  
77 case 1). Subsequently, it was applied to two distinct clinically relevant applications: the development of a  
78 diagnostic biomarker that predicts the malignancy of lung nodules (use-case 2) and a prognostic biomarker for  
79 non-small cell lung cancer tumors in confirmed cancer cases (use-case 3). We evaluated two distinct  
80 approaches of how a pre-trained foundation model can be incorporated into training pipelines for  
81 downstream tasks, a direct approach of using the foundation model as a feature extractor combined with a  
82 linear classifier and another approach where the foundation model is fine-tuned through deep learning. The  
83 performance of the foundation model approaches was then evaluated and compared to conventional  
84 supervised approaches in the three clinical use cases. Our analysis delves into limited data scenarios,  
85 evaluating test-retest and inter-reader stability, determining explainability and interpretability through deep-  
86 learning attribution methods, and exploring biological associations with gene expression data. Our results  
87 demonstrate the potential of foundation models in discovering novel imaging biomarkers and their particular  
88 strength in applications with limited datasets. This evidence may extend to other clinical use cases and imaging  
89 modalities and can accelerate the widespread development and translation of imaging biomarkers into clinical  
90 settings. To allow effortless incorporation, external evaluation, and validation, we are providing open access  
91 to the foundation model along with reproducible workflows.

92

93

94

## 95 RESULTS

96 We developed a foundation deep learning model using SSL and tested the model's performance in three  
97 distinct use cases. The study design and the pre-training process are outlined in **Fig. 1**. We developed the  
98 foundation model using a dataset with 11,467 annotated CT lesions identified from 2,312 unique patients.  
99 Lesion findings were diverse and included multiple lesions, such as lung nodules, cysts, and breast lesions,  
100 among numerous others. A task-agnostic contrastive learning strategy was used to pre-train the model on  
101 these lesion findings (see **Fig. 1a**), which subsequently was evaluated in three diverse clinical applications and  
102 five distinct datasets (see **Fig. 1b**).

103

104 **Lesion anatomical site classification (Use-case 1)**. As a technical validation of the performance of the  
105 foundation model, we selected an in-distribution task (i.e., sourced from the same cohort as that of the  
106 foundation model pre-training) on 5,051 annotated lesions (see Use-case 1 in **Fig. 1b**). These specific lesions,  
107 however, were not included in the pre-training data. Classification models were developed to predict the  
108 correct anatomical site using a training and tuning dataset totaling 3,830 lesions. On an independent test set  
109 of 1,221 lesions, we evaluated the performance of two different implementations of the foundation model  
110 (see **Fig. 1c**).

111 We found that the foundation model approaches significantly outperformed the current standard  
112 supervised approach using a randomly initialized model (i.e., random initialization of weights; see **Fig. 1d**) in  
113 terms of balanced accuracy (BA) and mean average precision (mAP) (see **Fig. 2a, b**). When comparing  
114 classification performances, the foundation features-based classifier (0.779 [95% CI 0.749-0.809],  $p < 0.01$ ) and  
115 the fine-tuned foundation model (0.804 [95% CI 0.773-0.834],  $p < 0.01$ ), significantly improved BA ( $p < 0.01$ ) over  
116 the supervised model (0.72, [95% CI 0.689-0.750],  $p < 0.01$ ) (see **Fig. 2a**). In terms of mAP, the fine-tuned  
117 foundation model (0.856, [95% CI 0.828-0.886],  $p < 0.01$ ) provided a significant ( $p < 0.01$ ) performance benefit  
118 over the supervised model (mAP=0.818 [95% CI 0.779-0.847],  $p < 0.01$ ) (see **Fig. 2b**)

119 The performance advantage of the foundation model was even stronger in limited data scenarios (see  
120 **Fig. 2a, b**). When we reduced training data to 50% ( $n=2526$ ), 20% ( $n=1010$ ), and 10% ( $n=505$ ), the foundation  
121 model as a feature extractor significantly improved BA and mAP over the supervised model. The fine-tuned  
122 foundation model also significantly improved over the supervised model but failed to improve when training  
123 data was reduced to 10%. Individual comparisons between each model at different data percentages can be  
124 found in the supplementary material (see **Extended Data Table 1**).

125 To investigate feature separability, which indicates how well features can discriminate between  
126 anatomical sites, we used dimensionality reduction methods to visualize features generated on the test set by  
127 the foundation and the trained supervised models. The features from the foundation model produced  
128 semantically separable clusters for each anatomical site, while features from the supervised model showed  
129 poor separability (see **Fig. 2c-d**). Of note, unlike the supervised model, the foundation model was not exposed  
130 to anatomical site information during training.

131

132 **Nodule malignancy prediction (Use case 2).** To assess the robustness of the foundation model, we chose an  
133 out-of-distribution task (i.e., belonging to a different cohort than that of the foundation model training data)  
134 involving predicting the malignancy of lung nodules from the LUNA16 dataset (see Use-case II in **Fig. 1b**). We  
135 conducted our training on a labeled subset of 507 lung nodules with indications of malignancy suspicion. On  
136 an independent test set of 170 nodules, we evaluated the performance of the two foundation model  
137 implementations and two supervised learning approaches - random initialization and fine-tuning from another  
138 supervised model. The model trained in use case 1 was chosen for the supervised fine-tuning.

139 The approach of fine-tuning the foundation model resulted in significant ( $p < 0.01$ ) superiority over  
140 both the supervised learning approaches (see **Fig. 3a, b**). The fine-tuned foundation model achieved an area-  
141 under receiver operating curve (AUC) of 0.944 (95% CI 0.914-0.982,  $p < 0.01$ ) and mAP of 0.952 (95% CI 0.926-  
142 0.986,  $p < 0.01$ ) compared to the fine-tuned supervised model's AUC of 0.857 (95% CI 0.806-0.918,  $p < 0.01$ ) and  
143 mAP of 0.874 (95% CI 0.822-0.936,  $p < 0.01$ ).

144 When analyzing reduced data sizes, the fine-tuned foundation model significantly ( $p < 0.01$ )  
145 outperformed the fine-tuned supervised model when data was reduced to 50% ( $n=254$ ) and 20% ( $n=101$ ).  
146 However, it did not significantly improve when data was reduced to 10% ( $n=51$ ). In contrast, the foundation  
147 model as a feature-extractor improved significantly ( $p < 0.005$ ) over all other models at 10%. Moreover,  
148 performance from the foundation model as a feature extractor remained relatively stable even when trained  
149 on 10% of the data, while all other models showed a significant drop in performance. Across the limited data  
150 evaluation, although fine-tuned supervised models showed a trend of improvement over randomly initialized  
151 supervised models, they were not found to be significant ( $p > 0.05$ ). Detailed comparisons can be found in the  
152 supplementary material (see **Extended Data Table 2**)

153 We observed that representations from the foundation model demonstrated superior linear  
154 discrimination compared to the supervised model, where samples remained interspersed between the classes  
155 (see **Fig. 3c, 3d**).

156

157 **Prognostication performance for non-small cell lung cancer (NSCLC) tumors (Use case 3).**

158 In the last use case, we evaluated the ability of the foundation model to capture quantitative radiographic  
159 phenotypes of NSCLC tumors and consequently determine the prognosis of patients using three independent  
160 cohorts of patients treated with surgery or radiation, HarvardRT ( $n=291$ ), LUNG1 ( $n=421$ ) and RADIO ( $n=144$ )  
161 (see use-case 3 in **Fig. 1b**). We aimed to investigate the performance of foundation model implementations  
162 when trained and applied to cohorts with strong distribution shifts (cohorts from separate institutions with  
163 different standards of care). Therefore, we trained and tuned our prognostication models using data from the  
164 HarvardRT cohort to predict 2-year overall survival after treatment and then compared the performance of  
165 the foundation model and supervised approaches on the LUNG1 and RADIO cohorts.

166

167 In the LUNG1 cohort, foundation models outperformed both supervised methods, with statistical significance  
168 ( $p < 0.05$ ). Features extracted from the foundation model obtained an AUC of 0.637 (95% CI 0.583-0.691), and  
169 fine-tuning the foundation model resulted in an AUC of 0.619 (95% CI 0.564-0.674), as shown in **Fig. 4a**. In  
170 comparison, training supervised models with randomly initialized weights resulted in an AUC of 0.531 (95% CI  
171 0.475-0.587). Fine-tuning a supervised model trained on a different task (use-case 1) showed an AUC of 0.566  
172 (95% CI 0.510-0.622). The best-supervised model (supervised fine-tuned) and the foundation model (features  
173 + linear classifier) were evaluated using Kaplan-Meier survival analysis, shown in **Fig. 4c** and **4e**, respectively.  
174 The foundation model demonstrated higher prognostic power by better stratifying mortality, as shown by a  
175 lower p-value ( $p < 0.0001$ ) when split by the median on the tuning set, compared to the supervised model  
176 ( $p = 0.03$ ). Kaplan-Meier curves and univariate Cox regression for all of the models can be found in the  
177 supplementary (see **Extended Data Fig. 1, Table 3**)

178 In the RADIO cohort, the foundation model as a feature extractor performed the best, with an AUC of  
179 0.61 (95% CI 0.501-0.720). Supervised models trained with random initialization had an AUC of 0.532 (95% CI  
180 0.426-0.639) while fine-tuning a supervised model led to an AUC of 0.567 (95% CI 0.468-0.665). Fine-tuning  
181 the foundation model did not improve performance, yielding an AUC of 0.532 (95% CI 0.428-0.636), as shown  
182 in **Fig. 4b**. Using foundation model features was significantly better than the randomly initialized supervised  
183 model ( $p < 0.05$ ), but none of the other networks showed significant differences from the rest ( $p > 0.05$ ). Kaplan-  
184 Meier survival analysis demonstrated significant stratification for the feature-extractor foundation model  
185 predictions ( $p = 0.008$ ) compared to the fine-tuned supervised model ( $p = 0.138$ ), as shown in **Fig. 4d** and **4f**.  
186 Kaplan-Meier curves and univariate Cox regression for all of the models can be found in the supplementary  
187 material (see **Extended Data Fig. 1, Table 3**).

188  
189 **Stability of the foundation model.** We evaluated the stability of our foundation model and compared it against  
190 supervised approaches in two ways: through a test-retest scenario and an inter-reader variability analysis. To  
191 assess test-retest robustness, we used scans from 26 patients from the RIDER dataset<sup>15</sup> taken within a 15-  
192 minute interval using the same imaging protocol. We found that predictions from the best-performing models,  
193 feature-extractor foundation, and fine-tuned supervised had high stability with intraclass correlation  
194 coefficient (ICC) values of 0.98 and 0.97, respectively. Furthermore, the test-retest features for both networks  
195 were strongly correlated (as shown in **Extended Data Fig. 2a** and **2b**).

196 To evaluate stability against inter-reader variability, we used the LUNG1 dataset and perturbed the  
197 input seed point to extract the 3D volume, simulating variations among human readers. We found that the  
198 feature-extractor foundation models had higher stability against simulated inter-reader variations in  
199 prediction performance than the fine-tuned supervised models (see **Extended Data Fig. 2c** and **2d**).

200  
201 **Saliency maps for fine-tuned foundation models.** To gain insight into the regions of the input volumes that  
202 contribute to a given prediction, we employed gradient-based saliency maps for foundation models fine-tuned  
203 on three selected use cases (as depicted in **Fig. 5**). We used smooth guided back-propagation<sup>16,17</sup> to compute

204 the gradient of the output with respect to the input while keeping the model weights constant. This provided  
205 insight into the regions of the input that had the most significant influence on the output prediction.

206 Our analysis revealed that fine-tuned foundation models for each use case focused on different  
207 regions but largely converged on tissues within or in proximity to the tumor. This is consistent with research  
208 demonstrating the tumor microenvironment's influence on cancer development<sup>18</sup> and prognosis. Specifically,  
209 lesion anatomical site classification models (as depicted in **Fig. 5a**) focused mainly on areas surrounding the  
210 lesions, such as the parenchyma and bone regions in the lung and the trachea in mediastinal lesions. On the  
211 other hand, nodule malignancy models (as depicted in **Fig. 5b**) primarily concentrated on the tissues of the  
212 nodule while avoiding high-density bone regions. In the case of prognosis networks (as depicted in **Fig. 5c**),  
213 the model predictions were primarily attributed to areas surrounding the center of mass of the tumor, with  
214 some contribution from high-density bone regions. Overall, these findings indicated that the areas that  
215 contribute to the networks' predictions varied in accordance with the specific use case, with the tumor and  
216 surrounding tissues playing a pivotal role.

217

218 **Underlying biological basis of the foundation model.** Finally, we investigated the biological basis of our  
219 foundation model by analyzing gene expression data associated with model predictions for 130 subjects from  
220 the RADIO dataset. To identify relevant genes, we selected the top 500 genes and performed a correlation  
221 analysis, comparing the feature-extractor foundation and fine-tuned supervised model predictions with gene  
222 expression profiles. We found that absolute correlation coefficients between gene expression profiles and  
223 model predictions were significantly higher ( $p=0.008$ ) for the foundation model, indicating a stronger  
224 association with underlying tumor biology (see **Fig. 6a**).

225 Additionally, we examined the genes associated with these models through a gene set enrichment  
226 analysis (genes with a correlation coefficient  $> 0.1$ ). Our analysis revealed that foundation models showed a  
227 pattern of enrichment of immune-associated pathways, including interferon signaling, interferon gamma  
228 signaling, MHC class II antigen presentation, and PD-1 signaling. Conversely, while the supervised model did  
229 show enrichment of individual pathways, no identifiable pattern was observed (see **Fig. 6b**).

230

231

232

233

234

235

236

237

238



## 239 DISCUSSION

240 In this study, we demonstrated that our foundation model trained using self-supervised learning, provided  
241 robust quantitative biomarkers for predicting anatomical site, malignancy, and prognosis across three  
242 different use cases in four cohorts. Several studies<sup>19–21</sup> have demonstrated the efficacy of self-supervised  
243 learning in medicine where only limited data might be available for training deep learning networks. Our  
244 findings complement and extend this for identifying reliable imaging biomarkers for cancer-associated use  
245 cases. We showed that our foundation model provided superior performance for anatomical lesion site and  
246 malignancy prediction. Modeling using features extracted from the foundation model was the most robust  
247 across tasks offering stable performance even when data sizes were considerably reduced to 51 samples (10%  
248 of use-case 2). These features could also categorize data from these tasks into semantically separable clusters  
249 corresponding strongly with target classes, although these features were learned independent of class  
250 information. Using these features provided the best performance on small cohorts in predicting prognosis and  
251 also demonstrated significant stratification of patients by their associated risk for each of the LUNG1 and  
252 RADIO cohorts ( $p < 0.01$ ). Additionally, predictions using the foundation model features were found to be highly  
253 stable against inter-reader (standard deviation=0.004) and test-retest variations (ICC=0.98). Regarding the  
254 interpretability of features, we observed that models focused on varying regions of the tumor and surrounding  
255 tissue relevant to the associated use case. To gain insight into the underlying biological associations of these  
256 features, RNA sequencing analysis combined with imaging data showed that these features correlated with  
257 immune-associated pathways.

258 Studies for predicting endpoints, such as overall survival on small cohorts largely rely on statistical  
259 feature extraction (engineered radiomics) and classical machine learning-based modeling. Precise three-  
260 dimensional segmentations are required for extracting these statistical features from tumor volumes  
261 increasing the annotation burden associated with these studies. Moreover, these statistical features are  
262 affected by several confounders, such as inter-reader variability in segmentations<sup>22</sup> and acquisition settings  
263 of the scanners<sup>23</sup>. Deep learning methods, in comparison, are robust to differences in acquisition and  
264 segmentation variability and provide improved performance over statistical features<sup>10</sup>. However, they remain  
265 restricted in their applicability in such low-data scenarios due to their dependency on large amounts of data  
266 to provide robust performance. Training deep-learning models on small cohorts often lead to overfitting,  
267 which diminishes performance when external data is introduced<sup>11</sup>. Our foundation model approach has  
268 several innovations: first, we developed a deep-learning system on a large corpus of 3D lesion images with  
269 considerable diversity in their presentation. To our knowledge, our study is the first to pre-train a deep-  
270 learning model using 11,467 3-dimensional lesion volumes. Second, we demonstrated that our pre-trained  
271 model learned generalizable features and improved performance across three tasks and associated endpoints.  
272 Our model also provided prognostic value when trained on small cohorts and applied to external validation  
273 cohorts. Third, our models showed high robustness to test-retest and inter-reader variations. Finally, we share



274 our validated foundation model with the public, allowing external testing and future studies to facilitate their  
275 adoption into external workflows.

276 Several studies have investigated deep learning algorithms for identifying cancer imaging biomarkers  
277 in both small and large cohorts. Hosny et al.<sup>10</sup> trained a deep learning model for lung cancer prognostication  
278 using several multi-institutional cohorts and demonstrated strong performance using deep learning methods  
279 over traditional radiomics features. Kumar et al.<sup>24</sup> identified radiomic sequences using deep convolutional  
280 encoders for determining the malignancy of lung nodules from the LIDC-IDRI dataset considering 4306 lesions.  
281 Lao et al.<sup>25</sup> proposed a deep-learning model-based radiomics signature for predicting survival in glioblastoma  
282 multiforme, trained and validated on relatively small cohorts. Haarbarger et al.<sup>26</sup> present a deep convolutional  
283 network-based approach to predict survival endpoints on the LUNG1 dataset. Cho et al.<sup>27</sup> developed a  
284 radiomics-guided deep-learning model for stratifying the prognosis of lung adenocarcinoma and validated it  
285 in a local cohort and an external validation cohort. A general trend observed across these studies is that the  
286 performance of deep learning models is more robust when larger and multi-institutional cohorts are available  
287 for training. Validation is subsequently performed on cohorts smaller than the training cohort. A demonstrated  
288 strength of our approach is that training on smaller cohorts performs well in larger validation cohorts. For the  
289 prognostication use case, we performed well on two external validation cohorts with a combined size  
290 considerably larger than the training cohort. Our pre-trained foundation model shows strong generalization  
291 ability across our diverse use cases and may apply to several other cancer imaging use cases out of the box.  
292 Furthermore, extracting features from our model (inference only) followed by simple modeling methods is  
293 resource-efficient, alleviating the need for expensive hardware for training standard deep-learning models  
294 while providing on-par performance.

295 In recent years, self-supervised pre-training has been applied to medical imaging with promising  
296 results<sup>19,21,28,29</sup>. Zhou et al.<sup>30</sup> present an approach that constructs several pre-text tasks to train SSL networks  
297 and show that they outperform solely supervised networks trained across five clinically relevant tasks. A novel  
298 contrastive SSL strategy incorporating both global and local information captured within medical images and  
299 reporting their superior performance, especially in low-data settings, is proposed by Chaitanya et al.<sup>31</sup>. Azizi et  
300 al.<sup>19</sup> demonstrate that grouping multiple images attributed to the same medical condition along with  
301 combining natural and medical images for contrastive SSL training improves performance. Specifically for deep  
302 radiomics applications, Li et al.<sup>32</sup> propose targeting data imbalance in existing data and present a combined  
303 approach of traditional radiomic features and self-supervised learning representations, improving  
304 performance for discriminating tumor grade and tumor staging tasks. Li et al.<sup>33</sup> proposed a novel self-  
305 supervised collaborative approach for creating latent representations from radiomic features. Zhao and Yang<sup>34</sup>  
306 used self-supervised learning to pre-train models via a radiomic-deep feature correspondence task. Although  
307 these studies have investigated self-supervised learning for radiomics tasks, they lacked external validation or  
308 proposed limited evaluation of the generalizability of their approaches. Our study presents a foundation model

309 for radiomic discovery by pre-training on a large cohort of lesions. The examined tasks are independent of the  
310 pre-training cohort and demonstrate the increased generalizability of our proposed approach.

311 Despite the strengths outlined in our study, we recognize several limitations that need to be addressed  
312 prior to the clinical applicability of our foundation model. Features from the foundation model followed by  
313 linear classifiers provided the most robust performance across all investigated tasks. However, linear classifiers  
314 might be sub-optimal in identifying complex relationships between feature representations to predict  
315 challenging endpoints. As we aimed to demonstrate the benefits of our foundation model compared to  
316 existing approaches, we have limited our exploration with fine-grained feature and model selection strategies.  
317 Comprehensive selection approaches similar to Parmar et al.<sup>35</sup> might improve performance even further,  
318 strengthening our hypothesis for foundation models.

319 Similarly, deep learning-based finetuning approaches employed in this study are representative of  
320 baseline performance. We observed that finetuning approaches for the foundation model in low data settings  
321 (especially 10%) and smaller cohorts (HarvardRT) resulted in suboptimal performance compared to using  
322 extracted features. We hypothesize that in lower data settings, models overfit the training data and  
323 demonstrate worse generalization as the number of parameters to tune increases. However, with the steady  
324 emergence of deep learning literature proposing improvements to handle aspects such as data imbalance,  
325 hyperparameter selection, and optimization objectives, the performance of these models can be pushed far  
326 above the current baseline. Our prognostication model is also limited in its performance due to our focus on  
327 solely imaging data; incorporating clinical features has a large potential to improve its effectiveness.

328 Our foundation model's clinical applicability encounters challenges typically associated with deep  
329 learning, including generalizability, interpretability, and explainability. Given the retrospective nature of this  
330 study, our capacity to evaluate the real-world practicality of foundation model-based biomarkers is  
331 constrained. Deep learning models are notorious for being black boxes that offer little clarity on interpretable  
332 and explainable reasoning behind their predictions. Although we used well-established saliency attribution  
333 methods to interpret our foundation model's predictions, the broader applicability of these insights is  
334 hindered by the technical limitations of such methods<sup>36,37</sup>. In addition to the limitations of deep learning  
335 methodology, the biological association analysis conducted to explain our model's predictions is preliminary  
336 and requires further investigation to generate a concrete understanding. We anticipate that future external  
337 validation of our open-access model will help confront these prevalent challenges.

338 In conclusion, our foundation model offers a powerful and reliable framework for discovering cancer  
339 imaging biomarkers, even in small datasets. Furthermore, it surpasses current deep learning techniques in  
340 various tasks while fitting conveniently into existing radiomic research methods. This approach can potentially  
341 uncover new biomarkers that significantly contribute to research and medical practice. We share our  
342 foundation model and reproducible workflows so that more studies can investigate our methods, determine  
343 their generalizability, and incorporate them into their research studies.

## 344 METHODS

345 **Study Population.** We utilize a total of five distinct datasets, four of which are publicly accessible, and one is  
346 an internal dataset. These were acquired from various institutions as components of separate investigations  
347 (see **Extended Data Table 4**).

348 DeepLesion<sup>14</sup> is a dataset comprising 32,735 lesions from 10,594 studies of 4,427 unique patients  
349 collected over two decades from the National Institute of Health Clinical Center PACS server. Various lesions,  
350 including kidney, bone, and liver lesions - as well as enlarged lymph nodes and lung nodules, are annotated.  
351 The lesions are identified through radiologist-bookmarked RECIST diameters across 32,120 CT slices. In our  
352 study, we excluded CT scans with a slice thickness exceeding 3mm, resulting in 16,518 remaining lesions.  
353 Subsequently, we divided this into 11,467 unlabelled lesions for contrastive training and 5,051 labeled lesions  
354 for anatomical site classification. The labeled lesion data were further separated randomly into training,  
355 tuning, and testing sets, containing 2,610, 1,220, and 1,221 lesions, respectively.

356 LUNA16<sup>38</sup> is a curated version of the LIDC-IDRI dataset of 888 diagnostic and lung cancer screening  
357 thoracic CT scans obtained from seven academic centers and eight medical imaging companies comprising  
358 1,186 nodules. The nodules are accompanied by annotations agreed upon by at least 3 out of 4 radiologists.  
359 Alongside nodule location annotations, radiologists also noted various observed attributes like internal  
360 composition, calcification, malignancy, suspiciousness, and more. For our evaluation, we chose nodules with  
361 at least one indication of malignancy suspicion, totaling 677. We randomly picked 338 nodules for training and  
362 169 for tuning the malignancy prediction networks. The final 170 nodules were utilized to assess the networks'  
363 performance.

364 HarvardRT<sup>10</sup> is a cohort of 317 patients with stage I-IIIB NSCLC treated with radiation therapy at the  
365 Dana-Farber Cancer Institute and Brigham and Women's Hospital, Boston, MA, US, between 2001 and 2015.  
366 All CT scans for this cohort were acquired with and without intravenous contrast on the GE Lightspeed CT  
367 scanner. The primary tumor site was contoured by radiation oncologists using soft tissue and lung windows.  
368 A subset of 291 patients with a follow-up of 2 years was selected for this study. We used 203 tumor volumes  
369 for training the prognostication networks and the remaining 88 tumor volumes for tuning.

370 LUNG1<sup>39</sup> is a cohort of 422 patients with stage I-IIIB NSCLC treated with radiation therapy at MAASTRO  
371 Clinic, Maastricht, The Netherlands. FDG PET-CT scans were acquired with or without contrast on the Siemens  
372 Biograph Scanner. Radiation oncologists used PET and CT images to delineate the gross tumor volume. For our  
373 study, we selected CT scans of 421 patients with annotated primary gross tumor volumes and used these as  
374 an independent test set for prognostication networks.

375 RADIO (NSCLC-Radiogenomics)<sup>40</sup> dataset is a collection of 211 NSCLC stage I-IV patients recruited  
376 between 2008 and 2012 who were referred for surgical treatment and underwent preoperative CT and PET/CT  
377 scans. These patients were recruited from the Stanford University School of Medicine and the Palo Alto  
378 Veterans Affairs Healthcare System. Scan scans were obtained using various scanners and protocols depending  
379 on the institution and physician. A subset of 144 patients in the cohort has available tumor segmentations

380 independently reviewed by two thoracic radiologists. In addition to imaging data, the dataset includes  
381 molecular data from EGFR, KRAS, ALK mutational testing, gene expression microarrays, and RNA sequencing.  
382 For the current study, we utilized the subset of 144 patients with annotated gross tumor volumes as an  
383 independent test set for prognostication and also investigated the biological basis of our networks using this  
384 dataset.

385

386 **Data Preprocessing.** CT scans were resampled using linear interpolation to achieve isotropic voxels with a  
387  $1\text{mm}^3$  resolution to address variations in slice-thickness and in-plane resolutions across study populations. We  
388 extracted patches of  $50 \times 50 \times 50$  voxels from the scans centered around a seed point (refer to **Extended Data**  
389 **Fig. 3**). For the DeepLesion dataset, which provided annotations in the form of RECIST diameters, the seed  
390 point was determined by calculating the midpoint of the RECIST diameter. For the other datasets (i.e., LUNA16,  
391 HarvardRT, LUNG1, and RADIO), which supplied annotations as 3D contours, the seed point was obtained by  
392 computing the center of mass (CoM). This approach allows for significantly higher throughput than manual  
393 segmentation, which can be more tedious. We then normalized the voxel values in the patches by subtracting  
394  $-1024$  (lower-bound Hounsfield unit) and dividing by  $3072$  (upper-bound Hounsfield unit), ensuring the  
395 intensity values in the input data ranged between 0 and 1.

396

397 **Task-agnostic contrastive pre-training of the foundation model.** We implemented contrastive pre-training  
398 using a modified version of the SimCLR framework<sup>5</sup>. The SimCLR framework's general principle involves  
399 transforming a single data piece (e.g., a patch taken from a CT scan) into two correlated and augmented  
400 samples (e.g., the same patch rotated 15 degrees clockwise and flipped horizontally). A convolutional encoder  
401 is then used to extract latent representations from these samples. Through a contrastive loss function<sup>41</sup>, the  
402 model learns to identify similar representations from the same data sample and dissimilar representations  
403 from different data samples. The framework emphasizes effective transformation choices, convolutional  
404 encoder architectures, and contrastive loss functions for optimal self-supervised learning performance. To  
405 effectively represent the nature of medical images, we made modifications to each of these components.

406 Transformations proposed in the original SimCLR framework for natural world images, such as cutout  
407 augmentation, Sobel filtering, and color distortion, are unsuited for 3D medical images due to dynamic range  
408 and color depth differences. Therefore, our study applies different augmentations to replace these  
409 transformations. For instance, we substituted the random color jitter transform with a random histogram  
410 intensity shift transform, as they both induce variation in intensity distribution.

411 To extract representations from the transformed 3D volumes, we selected the 3D ResNet50  
412 architecture as our deep convolutional encoder. While the SimCLR authors employed a 2D ResNet50  
413 architecture, we opted for its 3D counterpart, which has proven effective in handling 3D medical imaging  
414 data<sup>42</sup>.

415           Regarding loss functions, we extended normalized temperature-scaled cross-entropy loss (NT-Xent)<sup>43</sup>  
416 to support contrastive training for lesion volumes. The modifications include: 1) selecting positive pairs as 3D  
417 patches surrounding the lesion's seed point, 2) choosing negative pairs by randomly sampling 3D patches from  
418 the rest of the scan, and 3) computing the contrastive loss on these positive and negative pairs, with each  
419 iteration comprising N positive pairs and  $N*2(N-1)$  negative pairs. We also explored different temperature  
420 parameters for the NT-Xent loss. However, the original value of 0.1 proposed by the original paper was the  
421 most effective.

422           Our model was pre-trained for 100 epochs using an effective batch size of 64 (32 x 2 training nodes)  
423 on two NVIDIA Quadro RTX 8000 GPUs taking approximately five days. We used Stochastic Gradient Descent  
424 (SGD) as the optimizer, with layer-wise adaptive rate control (LARC), momentum, and weight-decay enabled.  
425 To improve the optimization process, we employed learning rate schedulers that combined linear and cosine  
426 decay strategies and a warmup phase to modify the learning rate at the beginning of training gradually. While  
427 most specifications were consistent with the original SimCLR experiments, we experimented with different  
428 batch sizes, patch sizes (50mm<sup>3</sup> and 64mm<sup>3</sup>), learning rates, transforms, and model architectures.

429  
430 **Task-specific training of the foundation model.** Our foundation model was adapted for a specific task through  
431 two approaches: 1) extracting features and fitting a linear classifier on top of them or 2) fine-tuning the pre-  
432 trained ResNet50 for the given classification task.

433           We extracted 4096 features from the foundation model for each data point and used them to train a  
434 logistic regression model using the scikit-learn framework<sup>44</sup>. A comprehensive parameter search for the  
435 logistic regression model was performed using the optuna hyper-parameter optimization framework<sup>45</sup>. No  
436 performance improvements were observed through feature selection strategies; therefore, all 4096 features  
437 were used in accordance with linear evaluation strategies prevalent in self-supervised learning (SSL) literature.

438           Fine-tuning was carried out with all layers updated during training, utilizing cross-entropy loss. A series  
439 of randomly chosen augmentations—random flips, random 90-degree rotations, and random translations of  
440  $\pm 10$  voxels across all axes—were applied throughout the training. SGD was employed for network training,  
441 with momentum enabled and step-wise learning rate decay. Following the original SimCLR experiments,  
442 configurations and similar parameters (including learning rate, transforms, and model architectures) were  
443 explored during hyperparameter tuning. Each network was trained for 100 epochs using a single NVIDIA  
444 Quadro RTX 8000 GPU, and the best-performing model checkpoints was chosen based on the tuning set.

445           For supervised baseline models, their weights were initialized randomly, and they were trained using  
446 the same configuration that was adopted for fine-tuning the foundation model. The supervised models for use  
447 cases 2 and 3 were also fine-tuned, utilizing the same configuration as in the pre-trained fine-tuning process  
448 but by initializing them with the weights of the trained supervised baseline from use case 1.

449           Task-specific training was conducted on reduced dataset sizes in addition to utilizing the entire  
450 dataset. We randomly sampled 50%, 20%, and 10% of the training and tuning datasets and constructed task-

451 specific models using these samples with the same configuration as the entire dataset. As the training dataset  
452 sizes decreased, we considered training the models for a higher number of epochs; however, models  
453 frequently overfitted during extended training. The entire test dataset was employed to allow benchmarking  
454 across these splits.

455  
456 **Performance Analysis.** Validation of the foundation model was performed using several use-case-relevant  
457 metrics. Lesion anatomical site classification performance was assessed using balanced accuracy (BA) as a  
458 multi-label counting metric and mean average precision (mAP) as a multi-threshold metric. The multi-label  
459 metric, BA, adjusts class-wise accuracy based on the class distribution at a chosen threshold (0.5). The multi-  
460 threshold metric, mAP, enables the examination of a given class's performance across a range of prediction  
461 thresholds. All classes other than the class of interest are considered negatives, and performance is averaged  
462 across all possible classes. We avoided using the area under the receiver operating curve (AUC-ROC) for this  
463 use case due to the high proportion of negatives relative to positives, which results in consistently low false-  
464 positive rates and might overestimate the AUC. However, due to a more balanced class distribution, nodule  
465 malignancy prediction was evaluated using AUC-ROC. NSCLC prognostication networks also employed AUC-  
466 ROC for evaluation, as it estimates the ranking of subjects based on their survival times.

467 Models underwent pairwise comparison using permutation tests. N permutations (N=1000) were  
468 conducted for each pair, and new models were computed after permuting class labels. Metrics were  
469 recalculated after resampling, and a two-sided p-value was calculated to test the null hypothesis of  
470 observations from each pair originating from the same underlying distribution. Additionally, 95% confidence  
471 intervals were established for each model using a bootstrap test with N=9999 resamples.

472 Kaplan-Meier (KM) curves were also used to determine the stratification of subjects based on their  
473 prediction scores for the prognostication models. Groups were selected based on prediction scores on the  
474 tuning set, and curves were plotted on the test set for these groups. Multivariate log-rank tests were used to  
475 examine the significance of the stratification. Univariate Cox regression models were built using the model  
476 predictions as the categorical variables of interest, grouped similarly to the KM curve.

477  
478 **Feature visualization and saliency maps.** We used the foundation and top-performing supervised models as  
479 feature extractors to obtain 4096 distinct features per data point. To enable visual interpretation of these  
480 high-dimensional features, we utilized t-SNE<sup>46</sup> (t-Stochastic Neighbourhood Embeddings) to reduce their  
481 dimensionality to 2D. To arrive at the most interpretable visualization, we explored various parameter  
482 configurations, including perplexity, initialization, and learning rates. Points in the 2D visualization were color-  
483 coded according to their respective target classes, despite dimensionality reduction being agnostic to these  
484 distinctions. Density contours were superimposed over the visualizations to enhance the understanding of  
485 group patterns, offering a more comprehensive representation of trends across data points.



486 In order to generate saliency maps for each task, the fine-tuned foundation model was used to  
487 generate predictions on randomly selected volumes from respective datasets. The fine-tuned foundation  
488 model with a single output prediction (corresponding to the predicted target class) was chosen in contrast to  
489 the feature extractor as computing saliency maps over 4096-dimensional outputs remains challenging in  
490 practice. We used a combination of 1) smooth gradient backpropagation, which averages gradients of the  
491 output with respect to several noisy inputs, and 2) guided back-propagation which combines deconvolution  
492 with backpropagation, mainly stopping the flow of negative gradients or neurons that decrease the activation  
493 signal. The method is termed smooth guided-backpropagation and is implemented in the MONAI framework  
494 <sup>47</sup>.

495  
496 **Stability Testing.** To test the stability of our models, we performed a test-retest stability and inter-reader  
497 variation evaluation. For the test-retest evaluation, we compared model predictions (of outcome) from the  
498 best foundation and supervised models generated on chest CT scans taken in a 15-minute interval for 32  
499 patients. Intraclass correlation coefficient (ICC) was computed using the interrater reliability and agreement  
500 package (*irr*) in R<sup>48</sup>. We also tested the stability of the flattened features computed by the models by  
501 calculating Spearman correlation and R<sup>2</sup>.

502 For the inter-reader variation evaluation, we used the LUNG1 dataset and generated 50 random  
503 perturbations sampled from a three-dimensional multivariate normal distribution with zero mean and  
504 diagonal covariance matrix for each seed point. Across each dimension, a variance of 16 voxels was used for  
505 generating samples. We generated predictions on perturbed seed points using the best foundation and  
506 supervised model, resulting in 50 different prediction models for each. The mean and variance of the 50  
507 models were computed for each and compared.

508  
509 **Biological Associations.** The GSE103584 dataset contains 130 NSCLC (Non-Small Cell Lung Cancer) samples  
510 that consist of paired CT scans and gene expression profiles generated by RNA sequencing. To analyze gene  
511 expression profiles, we filtered them based on cohort mean expression and standard deviation. First, we took  
512 only the genes with a higher expression than the overall dataset mean and then picked the top 500 genes  
513 based on standard deviation. Next, we performed a correlation analysis comparing the best-supervised and  
514 foundation models. To further evaluate foundation model features' association with tumor biology, we  
515 computed the absolute value of the correlation coefficients and performed a gene set enrichment analysis  
516 with all genes with a correlation coefficient above 0.1.

517  
518  
519  
520  
521  
522



## 523 **ACKNOWLEDGEMENTS**

524 The authors acknowledge financial support from NIH (H.J.W.L.A: NIH-USA U24CA194354, NIH-USA  
525 U01CA190234, NIH-USA U01CA209414, and NIH-USA R35CA22052), and the European Union - European  
526 Research Council (H.J.W.L.A: 866504).

527

## 528 **AUTHOR CONTRIBUTIONS**

529 Study conceptualization: S.P, H.J.W.L.A.; Data acquisition, analysis, and interpretation: S.P, D.B, A.H, T.L.C,  
530 H.J.W.L.A.; Methodological design and implementation: S.P, D.B.; Conceptualization of assessment strategies:  
531 S.P, D.B, N.J.B, H.J.W.L.A; Statistical Analyses: S.P, M.S, N.J.B, H.J.W.L.A; Code and reproducibility: S.P, I.H, V.P;  
532 Writing of the manuscript: S.P, D.B, M.S, S.B, H.J.W.L.A; Critical revision of the manuscript: All authors; Study  
533 supervision: H.J.W.L.A

534

## 535 **DATA AVAILABILITY STATEMENT**

536 The majority of the datasets utilized in this study are openly accessible for both training and validation  
537 purposes and can be obtained from the following sources: i) DeepLesion [[nihcc.app.box.com/v/DeepLesion](http://nihcc.app.box.com/v/DeepLesion)],  
538 used both for our pre-training and use-case 1 ii) LUNA16 [[luna16.grand-challenge.org](http://luna16.grand-challenge.org)] used for developing  
539 our diagnostic image biomarker iii) LUNG1 [[wiki.cancerimagingarchive.net/display/Public/NSCLC-Radiomics](http://wiki.cancerimagingarchive.net/display/Public/NSCLC-Radiomics)]  
540 and iv) RADIO [[wiki.cancerimagingarchive.net/display/Public/NSCLC+Radiogenomics](http://wiki.cancerimagingarchive.net/display/Public/NSCLC+Radiogenomics)] used for the validation  
541 of our prognostic image biomarker model. The training dataset for our prognostic biomarker model,  
542 HarvardRT, is internal and unavailable to the public. HarvardRT was collected under an IRB-approved  
543 retrospective protocol with a waiver of consent (Dana-Farber/Harvard Cancer Center protocol 11-286). As  
544 the trained foundational model is public, all the results can be reproduced using the accessible test datasets.

545

## 546 **CODE AVAILABILITY STATEMENT**

547 The complete pipeline used in this study can be accessed either from the [AIM webpage](#) or directly on [GitHub](#).  
548 This includes the code for 1) Data download and pre-processing: Starting from downloading the data to  
549 generating splits used in our study; 2) Replicating the training and inference of foundation and supervised  
550 models across all tasks; and 3) Code for reproducing our comprehensive performance validation. In addition  
551 to the code, we also provide trained model weights, extracted features, and outcome predictions for all the  
552 models used in our study. Most importantly, we provide our foundation model accessible through a simple  
553 pip package install and 2 lines of code to extract features for your data. We also provide a detailed  
554 documentation website that can be accessed [here](#). The final model weights will also be made available through  
555 the [Zenodo.org](#) platform as well as through [Mhub.ai](#) in a reproducible, containerized, off-the-shelf executable  
556 format.

557

558

## 559 **COMPETING INTERESTS**

560 The authors declare no competing interests.

561

## 562 **REFERENCES**

- 563 1. Bommasani, R. *et al.* On the Opportunities and Risks of Foundation Models. *arXiv [cs.LG]* (2021).
- 564 2. Ouyang, L. *et al.* Training language models to follow instructions with human feedback. *arXiv [cs.CL]*  
565 27730–27744 (2022).
- 566 3. Devlin, J., Chang, M.-W., Lee, K. & Toutanova, K. BERT: Pre-training of Deep Bidirectional Transformers  
567 for Language Understanding. *arXiv [cs.CL]* (2018).
- 568 4. Radford, A. *et al.* Learning transferable visual models from natural language supervision. *arXiv [cs.CV]*  
569 8748–8763 (18--24 Jul 2021).
- 570 5. Chen, T., Kornblith, S., Norouzi, M. & Hinton, G. A Simple Framework for Contrastive Learning of Visual  
571 Representations. *arXiv [cs.LG]* (2020).
- 572 6. Oquab, M. *et al.* DINOv2: Learning robust visual features without supervision. *arXiv [cs.CV]* (2023).
- 573 7. Anja Thieme Microsoft Health Futures, United Kingdom *et al.* Foundation Models in Healthcare:  
574 Opportunities, Risks & Strategies Forward. <https://doi.org/10.1145/3544549.3583177>  
575 doi:10.1145/3544549.3583177.
- 576 8. Moor, M. *et al.* Foundation models for generalist medical artificial intelligence. *Nature* **616**, 259–265  
577 (2023).
- 578 9. Mahajan, A. *et al.* Deep learning-based predictive imaging biomarker model for EGFR mutation status in  
579 non-small cell lung cancer from CT imaging. *J. Clin. Orthod.* **38**, 3106–3106 (2020).
- 580 10. Hosny, A. *et al.* Deep learning for lung cancer prognostication: A retrospective multi-cohort radiomics  
581 study. *PLoS Med.* **15**, e1002711 (2018).
- 582 11. Braghetto, A., Marturano, F., Paiusco, M., Baiesi, M. & Bettinelli, A. Radiomics and deep learning  
583 methods for the prediction of 2-year overall survival in LUNG1 dataset. *Sci. Rep.* **12**, 14132 (2022).
- 584 12. Balestrieri, R. *et al.* A Cookbook of Self-Supervised Learning. *arXiv [cs.LG]* (2023).
- 585 13. Huang, S.-C. *et al.* Self-supervised learning for medical image classification: a systematic review and

- 586 implementation guidelines. *NPJ Digit Med* **6**, 74 (2023).
- 587 14. Yan, K., Wang, X., Lu, L. & Summers, R. M. DeepLesion: automated mining of large-scale lesion  
588 annotations and universal lesion detection with deep learning. *J Med Imaging (Bellingham)* **5**, 036501  
589 (2018).
- 590 15. Zhao, B. *et al.* Evaluating variability in tumor measurements from same-day repeat CT scans of patients  
591 with non-small cell lung cancer. *Radiology* **252**, 263–272 (2009).
- 592 16. Springenberg, J. T., Dosovitskiy, A., Brox, T. & Riedmiller, M. Striving for Simplicity: The All Convolutional  
593 Net. *arXiv [cs.LG]* (2014).
- 594 17. Smilkov, D., Thorat, N., Kim, B., Viégas, F. & Wattenberg, M. SmoothGrad: removing noise by adding  
595 noise. *arXiv [cs.LG]* (2017).
- 596 18. Hinshaw, D. C. & Shevde, L. A. The Tumor Microenvironment Innately Modulates Cancer Progression.  
597 *Cancer Res.* **79**, 4557–4566 (2019).
- 598 19. Azizi, S. *et al.* Big Self-Supervised Models Advance Medical Image Classification. *arXiv [eess.IV]* (2021).
- 599 20. Krishnan, R., Rajpurkar, P. & Topol, E. J. Self-supervised learning in medicine and healthcare. *Nat*  
600 *Biomed Eng* **6**, 1346–1352 (2022).
- 601 21. Ghesu, F. C. *et al.* Self-supervised Learning from 100 Million Medical Images. *arXiv [cs.CV]* (2022).
- 602 22. Haarbuerger, C. *et al.* Radiomics feature reproducibility under inter-rater variability in segmentations of  
603 CT images. *Scientific Reports* vol. 10 Preprint at <https://doi.org/10.1038/s41598-020-69534-6> (2020).
- 604 23. Campello, V. M. *et al.* Minimising multi-centre radiomics variability through image normalisation: a pilot  
605 study. *Sci. Rep.* **12**, 12532 (2022).
- 606 24. Kumar, D. *et al.* Discovery Radiomics for Pathologically-Proven Computed Tomography Lung Cancer  
607 Prediction. *arXiv [cs.CV]* (2015).
- 608 25. Lao, J. *et al.* A Deep Learning-Based Radiomics Model for Prediction of Survival in Glioblastoma  
609 Multiforme. *Sci. Rep.* **7**, 10353 (2017).
- 610 26. Haarbuerger, C., Weitz, P., Rippel, O. & Merhof, D. Image-based Survival Analysis for Lung Cancer  
611 Patients using CNNs. *arXiv [cs.CV]* (2018).
- 612 27. Cho, H.-H. *et al.* Radiomics-guided deep neural networks stratify lung adenocarcinoma prognosis from

- 613 CT scans. *Commun Biol* **4**, 1286 (2021).
- 614 28. Taleb, A. *et al.* 3d self-supervised methods for medical imaging. *Adv. Neural Inf. Process. Syst.* **33**,  
615 18158–18172 (2020).
- 616 29. Tiu, E. *et al.* Expert-level detection of pathologies from unannotated chest X-ray images via self-  
617 supervised learning. *Nat Biomed Eng* **6**, 1399–1406 (2022).
- 618 30. Zhou, Z. *et al.* Models Genesis: Generic Autodidactic Models for 3D Medical Image Analysis. *Med. Image*  
619 *Comput. Comput. Assist. Interv.* **11767**, 384–393 (2019).
- 620 31. Chaitanya, K., Erdil, E., Karani, N. & Konukoglu, E. Contrastive learning of global and local features for  
621 medical image segmentation with limited annotations. *arXiv [cs.CV]* (2020).
- 622 32. Li, H. *et al.* Imbalance-Aware Self-supervised Learning for 3D Radiomic Representations. in *Medical*  
623 *Image Computing and Computer Assisted Intervention – MICCAI 2021* 36–46 (Springer International  
624 Publishing, 2021).
- 625 33. Li, Z. *et al.* A Novel Collaborative Self-Supervised Learning Method for Radiomic Data. *arXiv [eess.IV]*  
626 (2023).
- 627 34. Zhao, Z. & Yang, G. Unsupervised Contrastive Learning of Radiomics and Deep Features for Label-  
628 Efficient Tumor Classification. in *Medical Image Computing and Computer Assisted Intervention –*  
629 *MICCAI 2021* 252–261 (Springer International Publishing, 2021).
- 630 35. Parmar, C., Grossmann, P., Bussink, J., Lambin, P. & Aerts, H. J. W. L. Machine Learning methods for  
631 Quantitative Radiomic Biomarkers. *Sci. Rep.* **5**, 13087 (2015).
- 632 36. Adebayo, J., Gilmer, J. & Muelly, M. Sanity checks for saliency maps. *Adv. Neural Inf. Process. Syst.*  
633 (2018).
- 634 37. Arun, N. *et al.* Assessing the Trustworthiness of Saliency Maps for Localizing Abnormalities in Medical  
635 Imaging. *Radiol Artif Intell* **3**, e200267 (2021).
- 636 38. Setio, A. A. A. *et al.* Validation, comparison, and combination of algorithms for automatic detection of  
637 pulmonary nodules in computed tomography images: The LUNA16 challenge. *Med. Image Anal.* **42**, 1–  
638 13 (2017).
- 639 39. Kirby, J. NSCLC-Radiomics. <https://wiki.cancerimagingarchive.net/display/Public/NSCLC-Radiomics>.

- 640 40. Napel, S. NSCLC radiogenomics: Initial Stanford study of 26 cases. *The Cancer Imaging Archive*.
- 641 41. Wang, F. & Liu, H. Understanding the behaviour of contrastive loss. *arXiv [cs.LG]* 2495–2504 (2020).
- 642 42. Uemura, T., Näppi, J. J., Hironaka, T., Kim, H. & Yoshida, H. Comparative performance of 3D-DenseNet,  
643 3D-ResNet, and 3D-VGG models in polyp detection for CT colonography. in *Medical Imaging 2020:  
644 Computer-Aided Diagnosis* vol. 11314 736–741 (SPIE, 2020).
- 645 43. Sohn, K. Improved deep metric learning with multi-class n-pair loss objective. *Adv. Neural Inf. Process.  
646 Syst.* **29**, (2016).
- 647 44. Pedregosa, F. *et al.* Scikit-learn: Machine Learning in Python. *arXiv [cs.LG]* 2825–2830 (2012).
- 648 45. Akiba, T., Sano, S., Yanase, T., Ohta, T. & Koyama, M. Optuna: A Next-generation Hyperparameter  
649 Optimization Framework. in *Proceedings of the 25th ACM SIGKDD International Conference on  
650 Knowledge Discovery & Data Mining* 2623–2631 (Association for Computing Machinery, 2019).
- 651 46. Gmail, L. & Hinton, G. Visualizing Data using t-SNE.  
652 <https://www.jmlr.org/papers/volume9/vandermaaten08a/vandermaaten08a.pdf?fbclid=...> (2008).
- 653 47. Jorge Cardoso, M. *et al.* MONAI: An open-source framework for deep learning in healthcare. *arXiv  
654 [cs.LG]* (2022).
- 655 48. Gamer, M. irr : Various Coefficients of Interrater Reliability and Agreement. [http://cran.r-  
656 project.org/web/packages/irr/irr.pdf](http://cran.r-project.org/web/packages/irr/irr.pdf) (2010).

657  
658  
659  
660  
661  
662  
663  
664  
665  
666  
667  
668  
669  
670  
671

672

673

674

## FIGURES

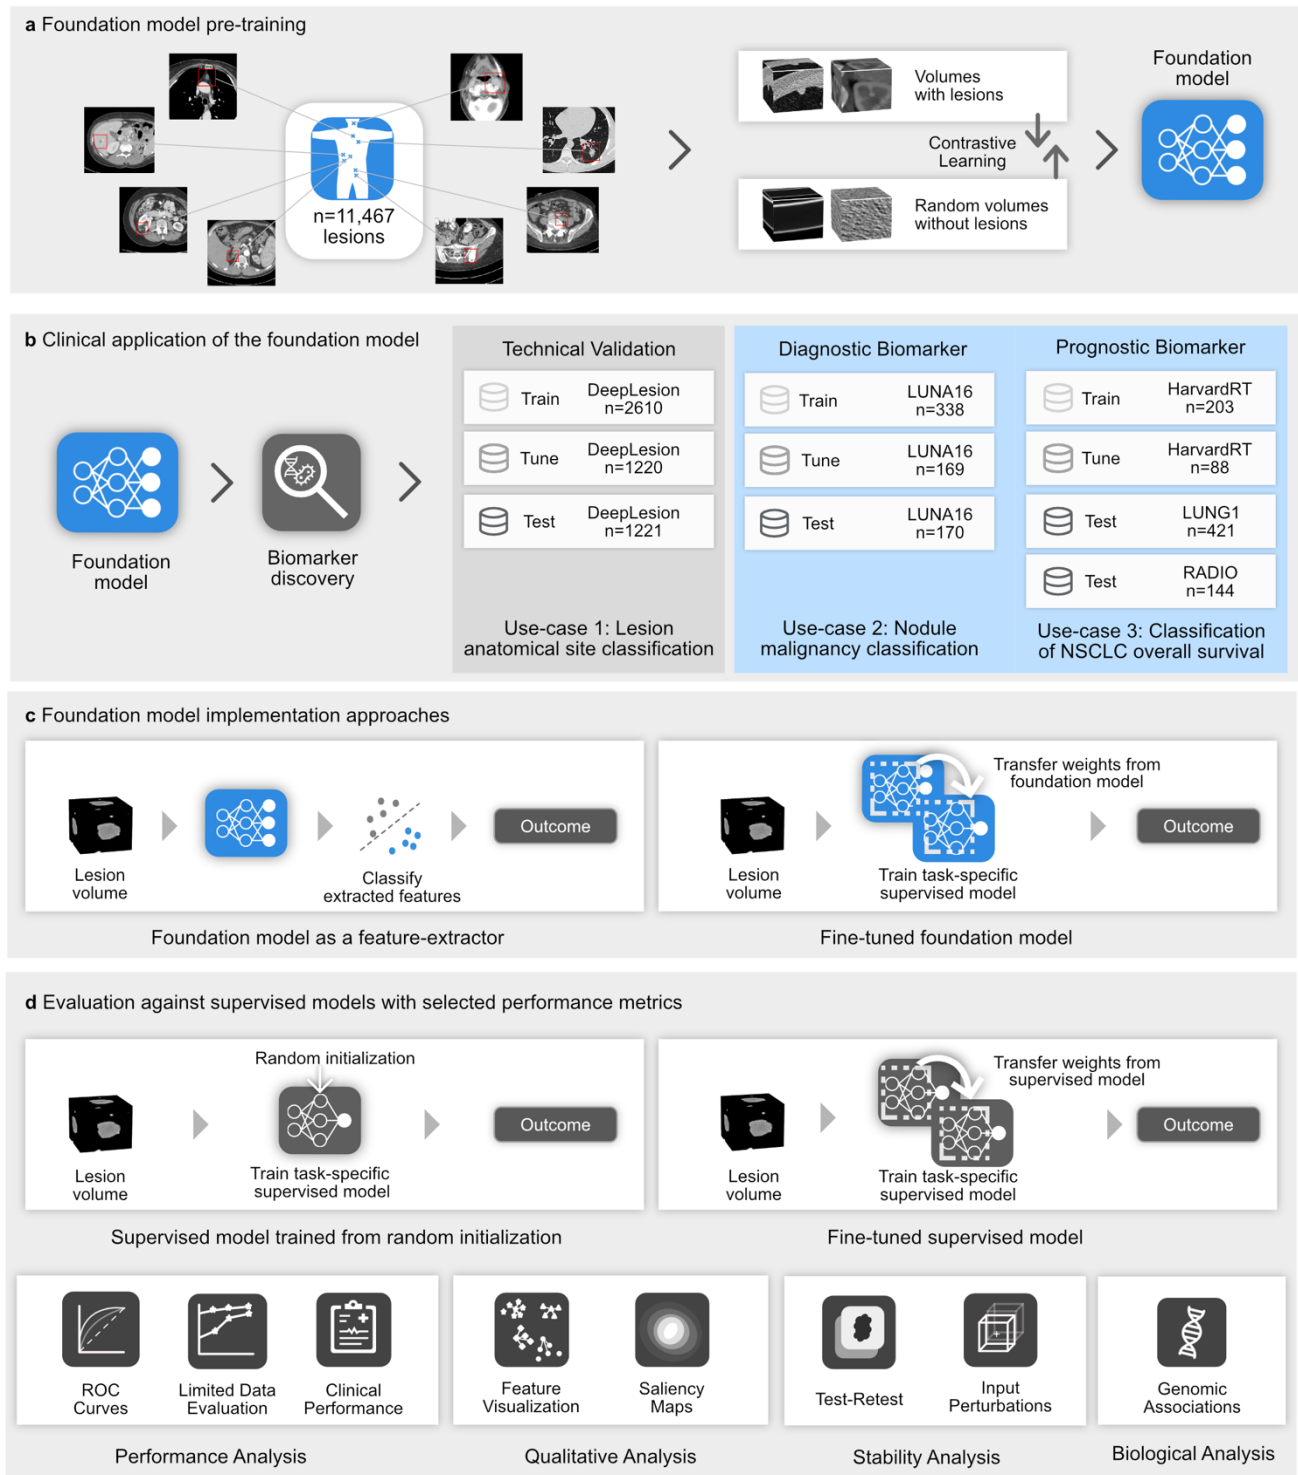

675

676

677

678

679

680

681

682

**Figure 1 | General overview of the study. a. Foundation model pre-training.** A foundation model, specifically a deep convolutional encoder model, was pre-trained by contrasting volumes with and without lesions. **b. Clinical application of the foundation model.** The foundation model was used to extract biomarkers and then evaluated for three classification tasks on diverse datasets. **c. Foundation model implementation approaches** The foundation model was adapted to specific use cases by extracting features or through fine-tuning (left). **d. Evaluation against supervised models with selected performance metrics.** We compared the performance of the foundation models against conventional supervised implementations, trained from random initialization (left) and fine-tuned from a different task (right). The comparison was made through several criteria for the different use

683 cases, including quantitative performance, stability, and biological analysis. Biological, clinical, and stability analyses are limited to use case 2 due to  
 684 the availability of associated data.

**a** Balanced accuracy of lesion anatomical site classification for the full training set and percentages of training data

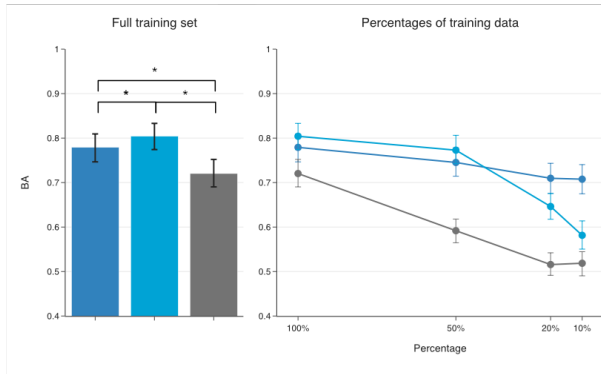

**b** Mean average precision of lesion anatomical site classification for the full training set and percentages of training data

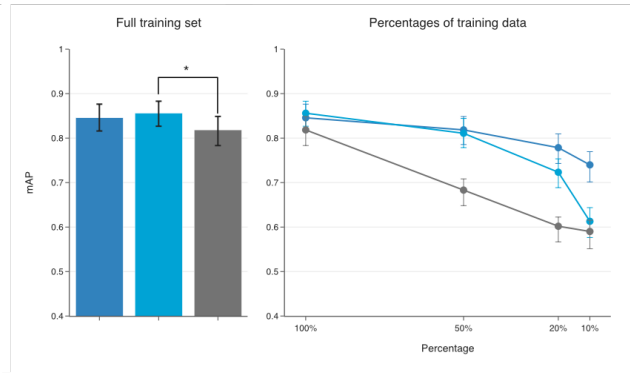

Models ■ Foundation model (Features) ■ Foundation model (Finetuned) ■ Supervised (Random init)

**c** Visualization of features extracted from the foundation model after t-SNE dimensionality reduction

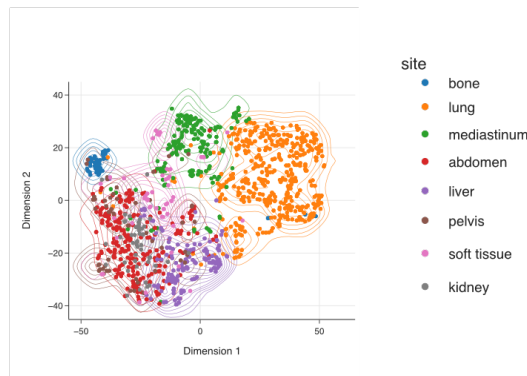

**d** Visualization of features extracted from the supervised model after t-SNE dimensionality reduction

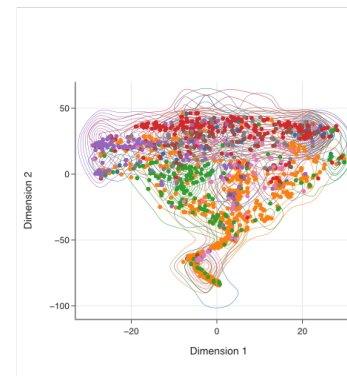

685

686

687 **Figure 2 | Performance of foundation model for lesion anatomical site classification.** We compared foundation model adaptation approaches  
 688 against a supervised model using balanced accuracy (a) and mean average precision (b). We show performance on these metrics computed across the  
 689 eight anatomical sites for the full training set and when the training data percentage is decreased to 50%, 20%, and 10%. Error bars in (a) and (b)  
 690 show 95% confidence intervals of the estimates. Visual representation of the features generated from the independent test-set for identifying lesion  
 691 anatomical sites, using c the foundation model as a feature extractor, and d the supervised model. For (c) and (d), the x-axis corresponds to dimension  
 692 1, and the y-axis to dimension 2 of the t-SNE dimensionality reduction. The density contours belonging to each class are overlaid for (c) and (d) to  
 693 highlight separability between classes in the feature space.

694

695

696

697

698

699

700

701

702

703

704

705



**a** Area under the receiver operating curve of nodule malignancy classification for full training set and percentages of training data

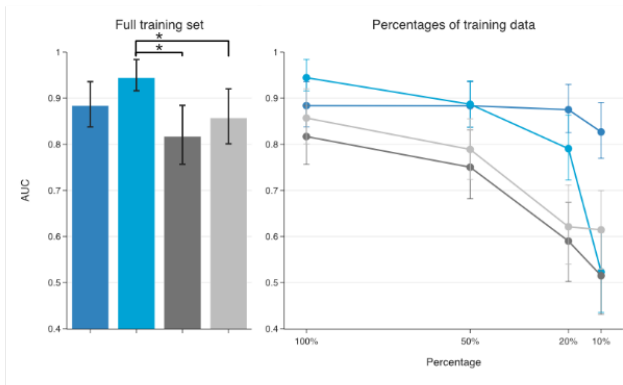

**b** Average precision of nodule malignancy classification for full training set and percentages of training data

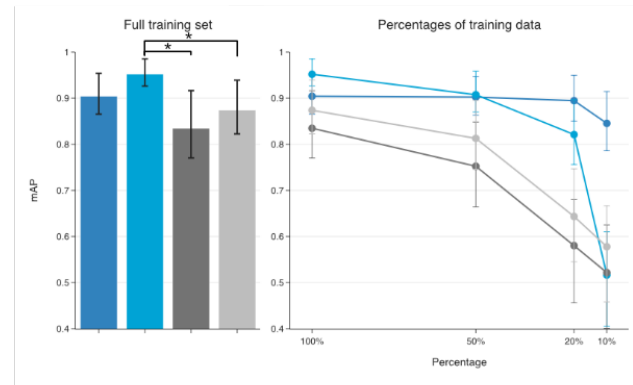

Models ■ Foundation model (Features) ■ Foundation model (Finetuned) ■ Supervised (Random init) ■ Supervised (Finetuned)

**c** Visualization of features extracted from the foundation model after t-SNE dimensionality reduction

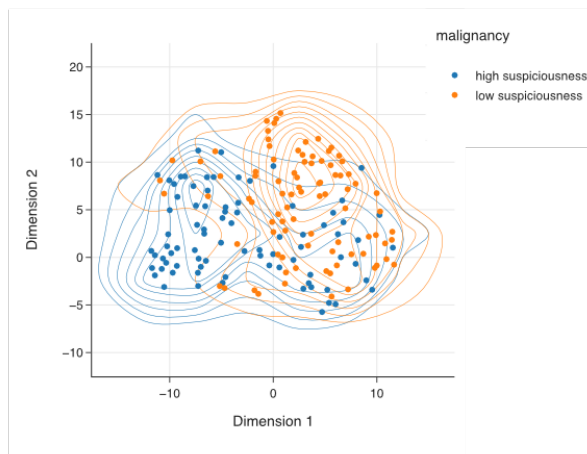

**d** Visualization of features extracted from the fine-tuned supervised model after t-SNE dimensionality reduction

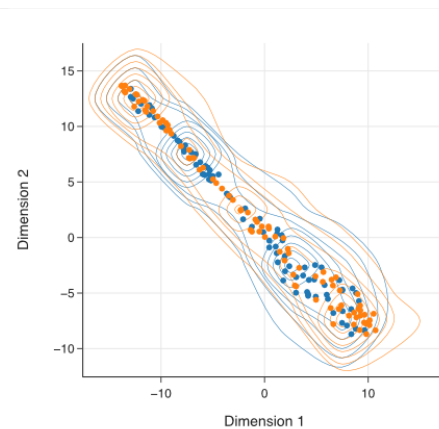

706

707

708

**Figure 3 | Performance comparison of the foundation model against supervised for nodule malignancy prediction.** We compared the foundation model adaptation approaches against baseline supervised models using the full training dataset and on decreasing the training data percentages to

709

50%, 20% and 10%. **a** Area under receiver operating curves (AUC-ROC) **b** Average precision (AP). Error bars in **(a)** and **(b)** show 95% confidence

710

intervals of the estimates. Visual representation of the features generated from the independent test-set for the task of nodule malignancy prediction

711

using, **c** the fine-tuned supervised model and **d** using the foundation model as a feature extractor. For **(c)** and **(d)**, the x-axis corresponds to dimension

712

1, and the y-axis to dimension 2 of the t-SNE dimensionality reduction. The density contours belonging to each class are underlaid for **(c)** and **(d)** to

713

highlight separability between classes in the feature space.

714

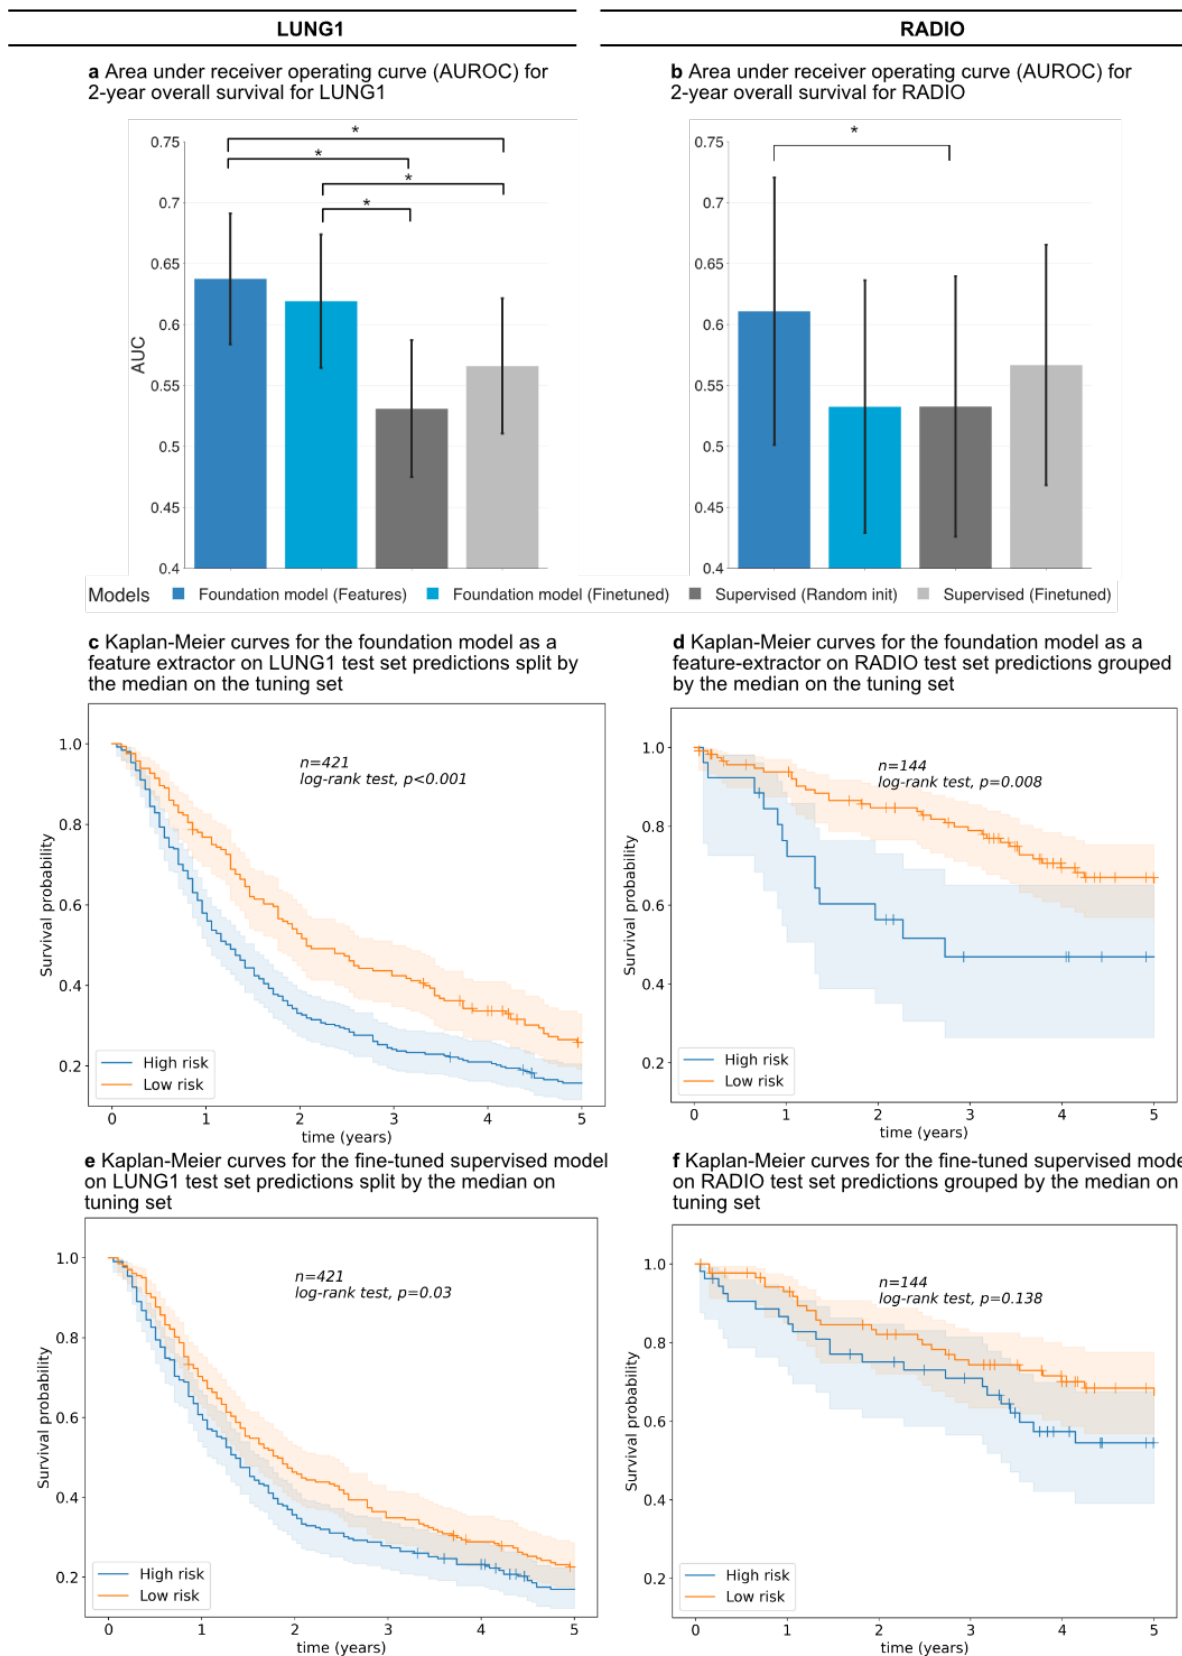

715

716

717

718

719

720

721

722

**Figure 4 | Performance of the foundation model against supervised for prognostication of NSCLC tumors.** We compared the foundation model against the baseline supervised models using the area under the receiver operating curve (AUC) for 2-year overall survival for **a** LUNG1 **b** RADIO. Kaplan-Meier (KM) curves for predictions generated from the foundation model as a feature-extractor for LUNG1 (**c**) and RADIO (**d**) as well as the fine-tuned supervised method for LUNG1 (**e**) and RADIO (**f**). To ensure a fair comparison, we calculated the threshold for the split between the KM groups on the tuning set for each network. Kaplan-Meier curves for the other approaches, fine-tuning the foundation model and training a supervised model from random initialization can be found in Fig. S1 in the supplementary.

**a** Gradient-based saliency map of the foundation model fine-tuned for lesion anatomical site classification

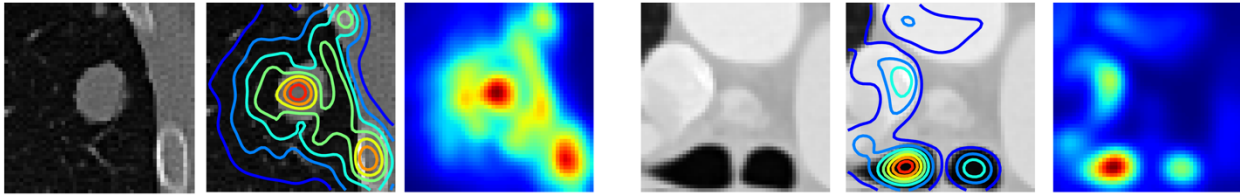

**b** Gradient-based saliency map of the foundation model fine-tuned for malignancy prediction

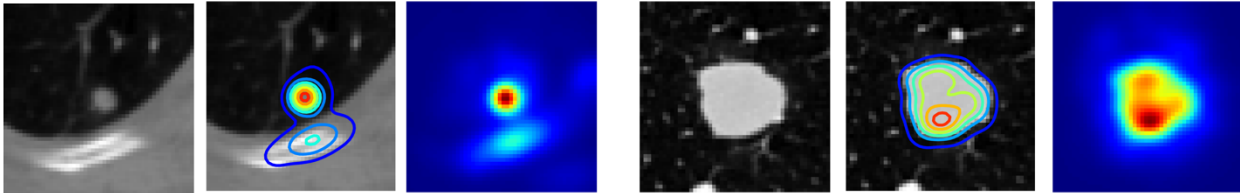

**c** Gradient-based saliency map of the foundation model fine-tuned for cancer prognostication

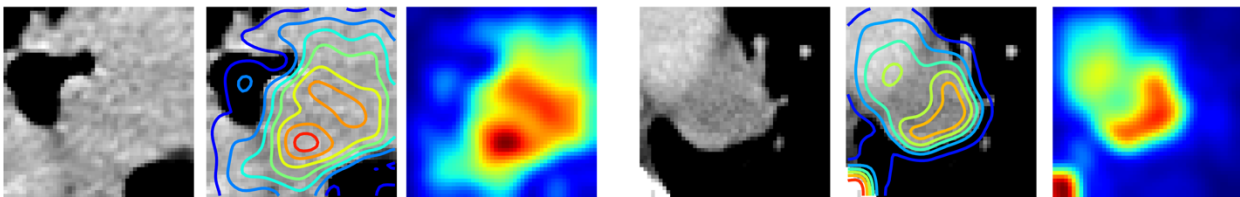

723

724

725

726

727

728

729

**Figure 5 | Saliency maps for fine-tuned foundation models.** We generated gradient-based saliency maps for each of the fine-tuned foundation models from use cases I (a), II (b), and III (c) using smooth guided backpropagation and visualized salient regions on two samples from corresponding test datasets. The first and fourth columns show the central axial slice (50mm x 50mm) of the volume provided as input to the self-supervised network. The second and fifth columns show isolines for saliency contours. Finally, the third and sixth columns show saliency maps highlighting areas of the input volume that contribute the most to a change in the output prediction.

**a** Absolute correlation coefficients between gene expression profiles and predictions of the feature-extractor foundation and fine-tuned supervised models

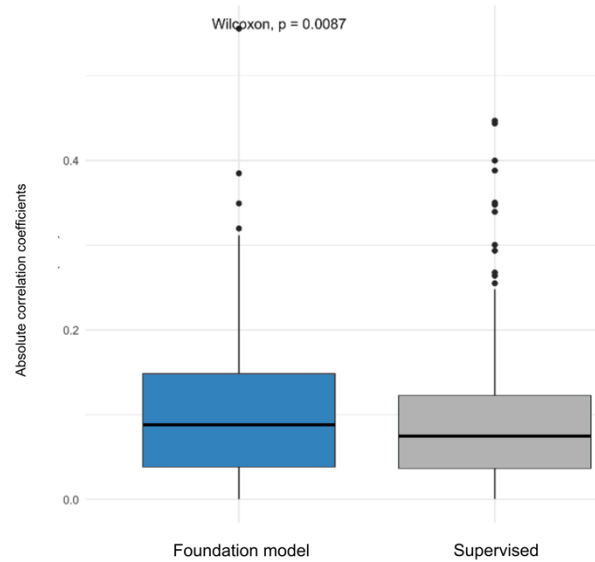

**b** Gene-set enrichment analysis to describe genes associated with each of the feature-extractor foundation and fine-tuned supervised model predictions. Genes with a correlation co-efficient > 0.1 were selected for the analysis

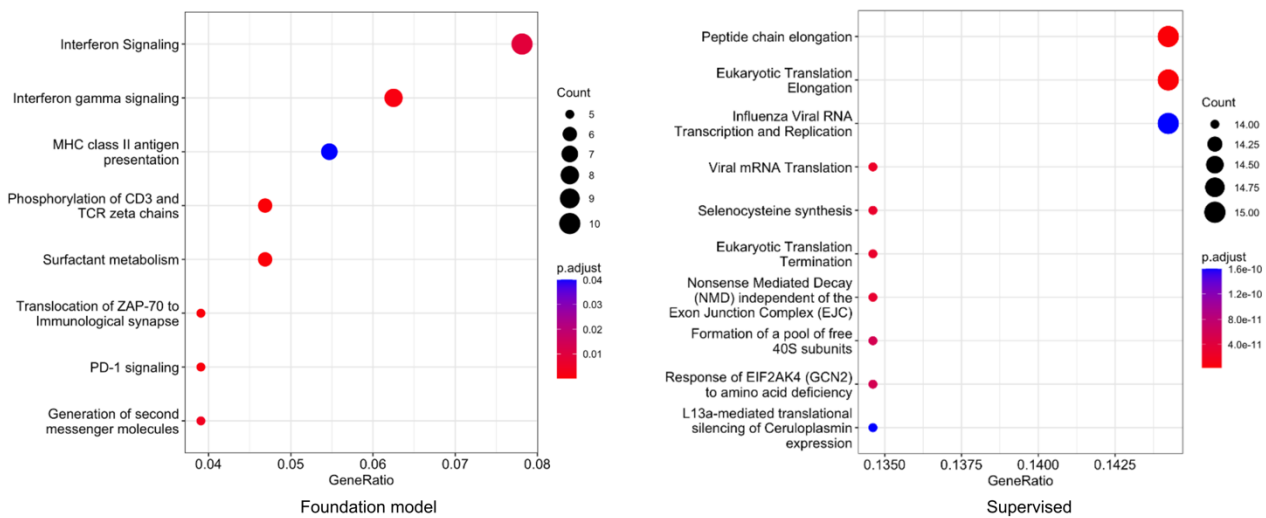

730

731

732 **Figure 6 | Underlying biological basis of the foundation model.** We compared the foundation and supervised model predictions with gene expression  
 733 profiles. **a** Box plot of absolute correlation coefficients (y-axis) of selected genes against model predictions (x-axis). **b** Gene-set enrichment analysis of  
 734 genes with correlation coefficient > 0.1 revealed for the foundation (left) and supervised model predictions (right). Genetic pathways are shown on the  
 735 y-axis, and the gene ratio is shown on the x-axis. Gene count and adjusted p-values are also shown in the legend.

736

737

738

739

740

741

742

743

744 **EXTENDED DATA**

745

| Foundation Model Implementation | Data percentage | Increase in BA over supervised (95% CI, p-value) | Increase in mAP over supervised (95% CI, p-value)       |
|---------------------------------|-----------------|--------------------------------------------------|---------------------------------------------------------|
| <b>Feature-extractor</b>        | 50%<br>(n=2526) | 0.153 (0.123-0.186,<br>p<0.005)                  | <i>0.135</i><br>(0.104-0.168,<br>p<0.005)               |
| <b>Fine-tuned</b>               |                 | <i>0.181</i> (0.147-0.214,<br>p<0.005)           | 0.127<br>(0.097-0.162,<br>p<0.005)                      |
|                                 |                 |                                                  |                                                         |
| <b>Feature-extractor</b>        | 20%<br>(n=1010) | <i>0.194</i> (0.159-0.228,<br>p<0.005)           | <i>0.177</i><br>(0.142-0.216,<br>p<0.005)               |
| <b>Fine-tuned</b>               |                 | 0.130 (0.102-0.159,<br>p<0.005)                  | 0.121<br>(0.089-0.159,<br>p<0.005)                      |
|                                 |                 |                                                  |                                                         |
| <b>Feature-extractor</b>        | 10%<br>(n=505)  | <i>0.189</i> (0.148-0.228,<br>p<0.005)           | <i>0.149</i><br>(0.112-0.189,<br>p<0.005)               |
| <b>Fine-tuned</b>               |                 | 0.063<br>(0.028-0.098, p<0.005)                  | <b>0.02</b><br><b>(-0.011- 0.061,</b><br><b>p=0.28)</b> |

746

747 **Extended Data Table 1 | Detailed comparison of the foundation model implementations against supervised methods in limited data settings for**  
 748 **lesion anatomical site classification** Comparison of the foundation model as a feature-extractor and fine-tuned against the randomly initialised  
 749 supervised model at 50%, 20% and 10% training data. For each data percentage, the largest increase in performance between the two is shown italicised.  
 750 Not significant results are shown in red

751

752

753

754

755

756

757

758

759

760

761

762

763

764

765

766

767

768

769

770

771  
772  
773  
774

| Foundation Model Implementation | Data percentage | Increase in AUC over supervised random initialization (95% CI, p-value) | Increase in mAP over supervised random initialization (95% CI, p-value) | Increase in AUC over supervised fine-tuned (95% CI, p-value) | Increase in mAP over supervised fine-tuned (95% CI, p-value) |
|---------------------------------|-----------------|-------------------------------------------------------------------------|-------------------------------------------------------------------------|--------------------------------------------------------------|--------------------------------------------------------------|
| Feature-extractor               | 50% (n=254)     | 0.133 (0.064 - 0.207, p<0.005)                                          | 0.15 (0.068 - 0.222, p<0.005)                                           | 0.07 (0.021 - 0.167, p<0.05)                                 | 0.089 (0.024 - 0.153, p=0.063)                               |
| Fine-tuned                      |                 | 0.136 (0.070-0.199, p<0.005)                                            | 0.155 (0.083-0.223, p<0.005)                                            | 0.097 (0.035-0.155366, p<0.05)                               | 0.095 (0.035-0.148, p<0.005)                                 |
| Feature-extractor               | 20% (n=101)     | 0.285 (0.193-0.370, p<0.05)                                             | 0.314 (0.227-0.420, p<0.005)                                            | 0.254 (0.173-0.330, p<0.05)                                  | 0.251 (0.164-0.334, p<0.005)                                 |
| Fine-tuned                      |                 | 0.20 (0.092-0.308, p<0.005)                                             | 0.24 (0.138-0.35, p<0.005)                                              | 0.169 (0.093-0.245, p<0.005)                                 | 0.177 (0.089-0.260, p<0.005)                                 |
| Feature-extractor               | 10% (n=51)      | 0.312 (0.211-0.408, p<0.005)                                            | 0.323 (0.238-0.423, p<0.005)                                            | 0.212 (0.128-0.285, p<0.005)                                 | 0.268 (0.179-0.376, p<0.005)                                 |
| Fine-tuned                      |                 | 0.008 (-0.089 -0.101, p=0.919)                                          | -0.005 (-0.095-0.08, p=0.869)                                           | -0.091 (-0.015 - 0.171481, p<0.05)                           | -0.061 (-0.144 - 0.023, p=0.322)                             |

775  
776  
777  
778  
779  
780

**Extended Data Table 2 | Detailed comparison of the foundation model implementations against supervised methods in limited data settings for nodule malignancy classification** Comparison of the foundation model as a feature-extractor and fine-tuned against randomly initialised and fine-tuned supervised models at 50%, 20% and 10% of the training data. For each data percentage, the largest increase in performance between the two is shown italicised. Not significant results are shown in red

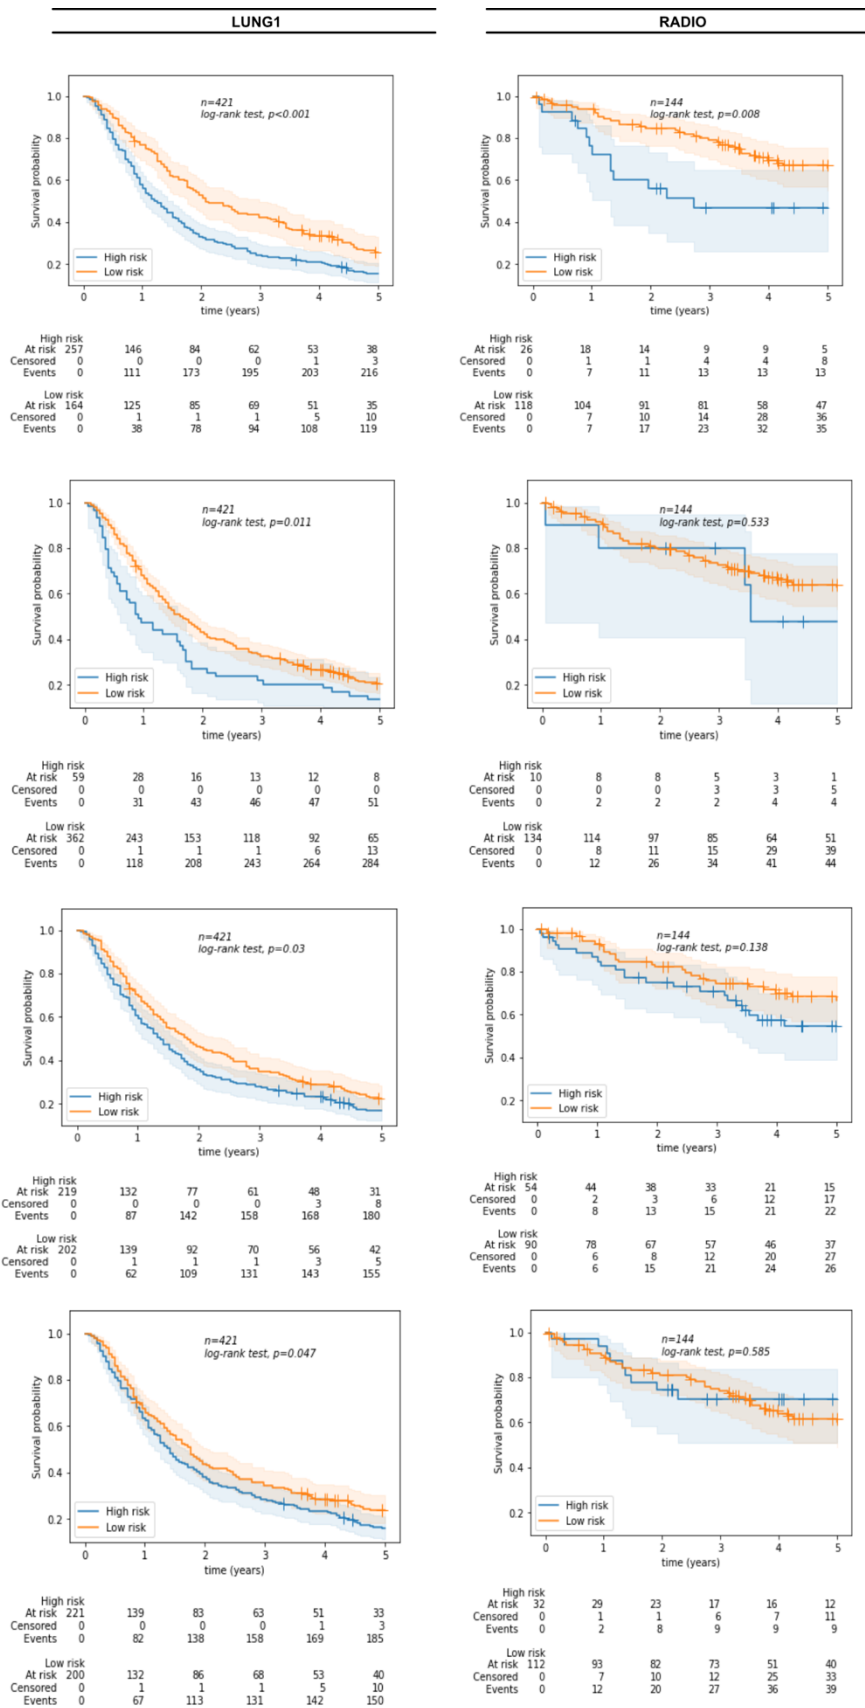

781

782

783

784

785

786

**Extended Data Figure 1 | Kaplan Meier curves for all models investigated** Kaplan Meier curves for the LUNG1 and RADIO datasets for the foundation model as a feature-extractor (first row), fine-tuned foundation model (second row), fine-tuned supervised model (third row) and randomly initialised supervised model (last row)



787

|                                              | LUNG1 |                    |         | RADIO |                    |         |
|----------------------------------------------|-------|--------------------|---------|-------|--------------------|---------|
|                                              | beta  | HR (95% CI for HR) | p.value | beta  | HR (95% CI for HR) | p.value |
| <b>Foundation model as feature extractor</b> | -0.44 | 0.65 (0.52-0.81)   | <0.005  | -0.84 | 0.43 (0.23-0.82)   | 0.01    |
| <b>Foundation model fine-tuned</b>           | -0.39 | 0.68 (0.5-0.92)    | 0.01    | -0.32 | 0.72 (0.26-2.01)   | 0.53    |
| <b>Supervised (fine-tuned)</b>               | -0.24 | 0.79 (0.64-0.98)   | 0.03    | -0.43 | 0.65 (0.37-1.15)   | 0.14    |
| <b>Supervised (random initialization)</b>    | -0.22 | 0.80 (0.65-1.00)   | 0.05    | 0.20  | 1.22 (0.59-2.53)   | 0.59    |

788

789

790 **Extended Data Table 3 | Univariate cox regression** Results of univariate cox models showing the relationship between implementations of the  
791 foundation model and the supervised methods and survival on LUNG1 and RADIO datasets. The median split on the training dataset (HarvardRT) is used,  
792 also shown in Fig S4 in the Kaplan-Meier curves.

793

794

795

796

797

798

799

800

801

802

803

804

805

806

807

808

809

810

811

812

813

814

815

816

817

**a** RIDER test features against retest features for the foundation model as a feature-extractor

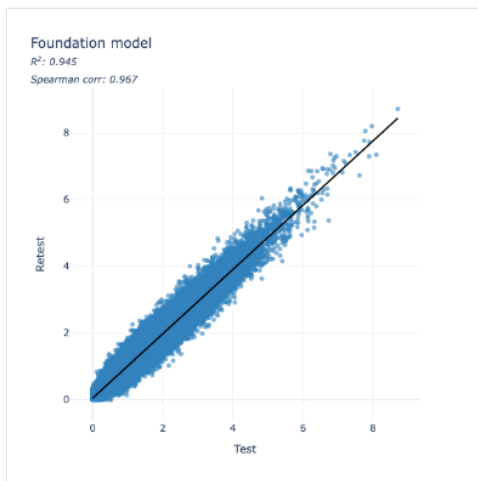

**b** RIDER test features against retest features for the fine-tuned supervised model

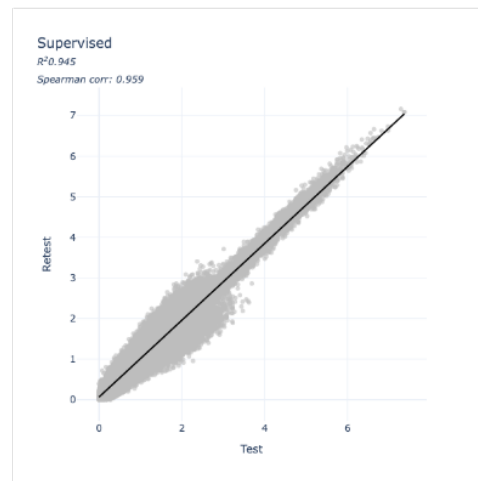

**c** Sampling distribution for input perturbations

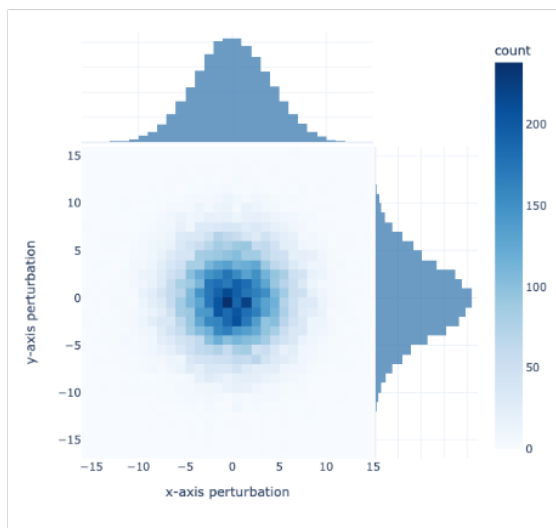

**d** Input stability of AUC for 2-year survival for the feature-extractor foundation and fine-tuned supervised model

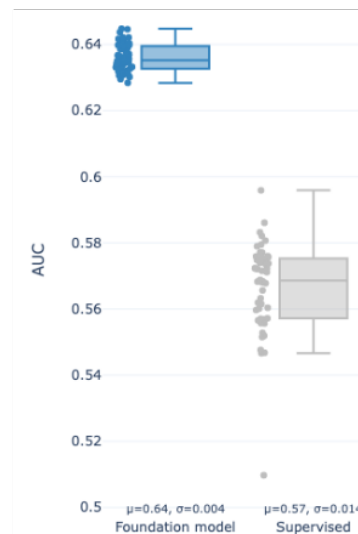

818

819

820

821

822

823

824

825

826

827

**Extended Data Figure 2 | Stability of self-supervised learning networks.** We analyzed the test-retest robustness on the RIDER dataset by comparing the correlation between features generated by **a.** the foundation model as a feature extractor and **b.** the fine-tuned supervised model. In **c.**, the inter-reader variability is simulated by adding perturbations from a sampling distribution. We perturb across x, y and z-axes although the distribution is shown only for x and y perturbations for simplicity. **d** Prognostic stability of the feature extractor foundation model against the fine-tuned supervised model when the input seed point is perturbed, estimated through AUC for 2-year survival.

### Lesion Dimensions

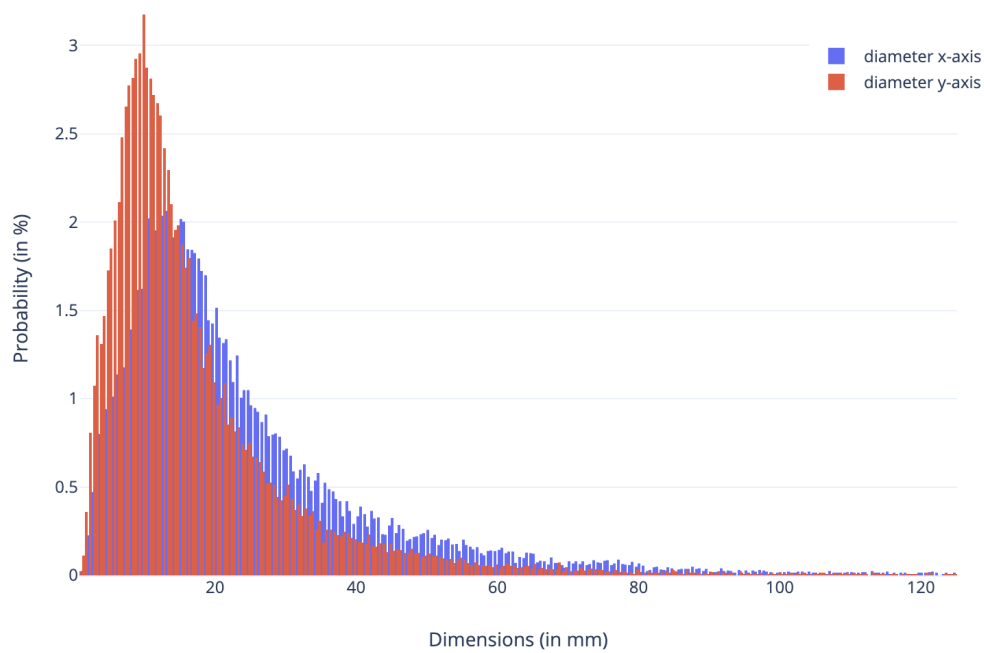

828  
829

830 **Extended Data Figure 3 | Diameter distribution of DeepLesion** Distribution of diameters in the x and y axes for the DeepLesion training dataset based  
831 on RECIST bookmarks identified on key slices. Input dimensions of 50x50x50 mm<sup>3</sup> were chosen as they covered 93% and 97% of the distribution in the x  
832 and y axes respectively.

833

834

835

836

837

838

839

840

841

842

843

844

845

846

847

848

849

850

851

852

853

|                    | Pre-training        | Use-case 1: Lesion Anatomical Site Classification |      |      | Use-case 2: Nodule Malignancy Classification |      |      | Use-case 3: Classification of survival for NSCLC tumors |                |                         |       | Stability |
|--------------------|---------------------|---------------------------------------------------|------|------|----------------------------------------------|------|------|---------------------------------------------------------|----------------|-------------------------|-------|-----------|
| <b>Cohorts</b>     | DeepLesion          | DeepLesion                                        |      |      | LUNA16                                       |      |      | HarvardRT                                               | LUNG1          | RADIO                   | RIDER |           |
| <b>Institution</b> | NIH Clinical Center | NIH Clinical Center                               |      |      | Multi-center                                 |      |      | Dana-Farber Cancer Center                               | MAASTRO Clinic | Stanford & Palo Alto VA | MSKCC |           |
| <b>Usage</b>       | Pre-train           | Train                                             | Tune | Test | Train                                        | Tune | Test | Train                                                   | Tune           | Test                    | Test  | Test      |
| <b>Scans</b>       | 11,467              | 2610                                              | 1220 | 1221 | 338                                          | 169  | 170  | 203                                                     | 88             | 421                     | 144   | 52        |
| <b>Patients</b>    | 2,312               | 553                                               | 379  | 390  | 266                                          | 149  | 150  | 203                                                     | 88             | 421                     | 144   | 26        |

854

|                             |             | Use-case 1: Lesion Anatomical Site Classification |           | Use-case 2: Nodule Malignancy Classification |                | Use-case 3: Classification of survival for NSCLC tumors |                |       |                |       |  |
|-----------------------------|-------------|---------------------------------------------------|-----------|----------------------------------------------|----------------|---------------------------------------------------------|----------------|-------|----------------|-------|--|
|                             |             |                                                   |           |                                              |                | HarvardRT                                               |                | LUNG1 |                | RADIO |  |
| <b>Outcome Distribution</b> | bone        | 4.1%                                              | benign    | 51.7%                                        | alive (2-year) | 54.2%                                                   | alive (2-year) | 59.8% | alive (2-year) | 64.5% |  |
|                             | abdomen     | 16.3%                                             |           |                                              |                |                                                         |                |       |                |       |  |
|                             | mediastinum | 14.3%                                             |           |                                              |                |                                                         |                |       |                |       |  |
|                             | liver       | 9.7%                                              |           |                                              |                |                                                         |                |       |                |       |  |
|                             | lung        | 41.1%                                             | malignant | 48.3%                                        | dead (2-year)  | 45.7%                                                   | dead (2-year)  | 40.1% | dead (2-year)  | 35.4% |  |
|                             | kidney      | 3.6%                                              |           |                                              |                |                                                         |                |       |                |       |  |
|                             | soft tissue | 4.6%                                              |           |                                              |                |                                                         |                |       |                |       |  |
|                             | pelvis      | 6.0%                                              |           |                                              |                |                                                         |                |       |                |       |  |
| <b>Sex</b>                  | M           | 58.5%                                             | na        |                                              | 52.2%          |                                                         | 68.8%          |       | 75%            |       |  |
|                             | F           | 41.5%                                             | na        |                                              | 47.7%          |                                                         | 31.1%          |       | 25%            |       |  |
| <b>Age (median)</b>         | 58.0        |                                                   | na        |                                              | 69.6           |                                                         | 68.69          |       | 69.0           |       |  |

855

856

857 **Extended Data Table 4 | Dataset breakdown** Table showing the 6 different cohorts used in this study along with eligible scans and patients used. A  
 858 secondary table shows the outcome, sex, and age distribution of each of the cohorts.

859

860

861

862

863
